# Supplementary material
Source: publisher figshare collection journal article supplement (https://brill.figshare.com/articles/dataset/_/23308559)
Supplement: Supplementary file 1 [file 1]

## Sheet: Table S1
Table S1. Database of the mtDNA gene ND4 for the alpine newt (Ichthyosaura alpestris). Samples in red are from introduced populations (localities of uncertain status in the Netherland are not highlighted; see Fig. 1 right panel). Samples highlighted yellow were both buccal and mouth swabbed.
Sample ID	Source	Locality	Latitude	Longitude	mtDNA clade	Haplotype code
ND4 long, newly generated in this study:
Ich_0414	This study	Albania: Fushe Okol	42.3964	19.6964	Montenegro	MONT_4
Ich_0419	This study	Albania: Pllaja e Markofces	42.5164	20.0093	Montenegro	MONT_5
Ich_0411	This study	Albania: Rabdisht	41.6824	20.521	Southern Balkans	SB_7
Ich_0412	This study	Albania: Rabdisht	41.6824	20.521	Southern Balkans	SB_7
Ich_0413	This study	Albania: Rabdisht	41.6824	20.521	Southern Balkans	SB_7
swab_0432	This study	Belgium: Natuurgebied 'De Brand'	51.126	5.723	Eastern/Western Europe & Spain	EWES_1
swab_0433	This study	Belgium: Natuurgebied 'De Brand'	51.126	5.723	Eastern/Western Europe & Spain	EWES_1
swab_0434	This study	Belgium: Natuurgebied 'De Brand'	51.126	5.723	Eastern/Western Europe & Spain	EWES_1
swab_0435	This study	Belgium: Natuurgebied 'Tommelen'	50.932	5.308	Eastern/Western Europe & Spain	EWES_1
swab_0436	This study	Belgium: Natuurgebied 'Tommelen'	50.932	5.308	Eastern/Western Europe & Spain	EWES_1
swab_0437	This study	Belgium: Natuurgebied 'Tommelen'	50.932	5.308	Eastern/Western Europe & Spain	EWES_1
swab_0429	This study	Belgium: Provinciaal Domein 'De Roomacker'	51.119	4.173	Eastern/Western Europe & Spain	EWES_1
swab_0430	This study	Belgium: Provinciaal Domein 'De Roomacker'	51.119	4.173	Eastern/Western Europe & Spain	EWES_1
swab_0431	This study	Belgium: Provinciaal Domein 'De Roomacker'	51.119	4.173	Eastern/Western Europe & Spain	EWES_1
swab_0440	This study	Belgium: Wervik	50.814	3.017	Eastern/Western Europe & Spain	EWES_1
swab_0439	This study	Belgium: Wervik	50.814	3.017	Eastern/Western Europe & Spain	EWES_1
Ich_0425	This study	Bosnia and Herzegovina: Bojište	44.6875	16.4378	Central Balkans	CB_14
Ich_0349	This study	Bosnia and Herzegovina: Bosanska Krupa	44.854	16.823	Central Balkans	CB_6
Ich_0353	This study	Bosnia and Herzegovina: Matinski vis	44.467	17.973	Central Balkans	CB_8
Ich_0354	This study	Bosnia and Herzegovina: Matinski vis	44.467	17.973	Central Balkans	CB_2
Ich_0355	This study	Bosnia and Herzegovina: Matinski vis	44.467	17.973	Central Balkans	CB_2
Ich_0356	This study	Bosnia and Herzegovina: Mt Ozren	43.92	18.47	Central Balkans	CB_9
Ich_0358	This study	Bosnia and Herzegovina: Mt. Èvrsnica	43.632	17.651	Central Balkans	CB_2
Ich_0359	This study	Bosnia and Herzegovina: Mt. Èvrsnica	43.632	17.651	Central Balkans	CB_2
Ich_0363	This study	Bosnia and Herzegovina: Mt. Igman	43.744	18.279	Central Balkans	CB_10
Ich_0364	This study	Bosnia and Herzegovina: Mt. Igman	43.744	18.279	Central Balkans	CB_9
Ich_0365	This study	Bosnia and Herzegovina: Mt. Igman	43.744	18.279	Central Balkans	CB_9
Ich_0367	This study	Bosnia and Herzegovina: Mt. Vranica	43.958	17.755	Central Balkans	CB_2
Ich_0368	This study	Bosnia and Herzegovina: Mt. Vranica	43.958	17.755	Central Balkans	CB_7
Ich_0369	This study	Bosnia and Herzegovina: Mt. Vranica	43.958	17.755	Central Balkans	CB_7
Ich_0373	This study	Bosnia and Herzegovina: Mt. Zelengora	43.368	18.593	Central Balkans	CB_9
Ich_0374	This study	Bosnia and Herzegovina: Mt. Zelengora	43.368	18.593	Central Balkans	CB_10
Ich_0464	This study	Bosnia and Herzegovina: Podgradina	43.6905	16.9029	Central Balkans	CB_19
Ich_0465	This study	Bosnia and Herzegovina: Podgradina	43.6905	16.9029	Central Balkans	CB_18
Ich_0466	This study	Bosnia and Herzegovina: Podgradina	43.6905	16.9029	Central Balkans	CB_2
Ich_0316	This study	Bulgaria: Divchovoto	42.8133	24.2066	Central Balkans	CB_3
Ich_0328	This study	Bulgaria: Dospat	41.6723	24.1098	Central Balkans	CB_3
Ich_0329	This study	Bulgaria: Dospat	41.6723	24.1098	Central Balkans	CB_3
Ich_0080	This study	Bulgaria: Nasalevtsi	42.831	22.4992	Vlasina	VLAS_1
Ich_0341	This study	Bulgaria: Novo Selo	42.1773	22.6794	Central Balkans	CB_4
Ich_0312	This study	Bulgaria: Petrohan	43.102	23.192	Central Balkans	CB_3
Ich_0334	This study	Bulgaria: Sarnitsa	41.7347	23.9579	Central Balkans	CB_3
Ich_0339	This study	Bulgaria: Yundola	42.0706	23.871	Central Balkans	CB_17
Ich_0340	This study	Bulgaria: Yundola	42.0706	23.871	Central Balkans	CB_3
Ich_0242	This study	Croatia: Dreznica	45.1137	15.1222	Northern Balkans & Romania	NBR_12
Ich_0243	This study	Croatia: Dreznica	45.1137	15.1222	Northern Balkans & Romania	NBR_12
Ich_0244	This study	Croatia: Dreznica	45.1137	15.1222	Northern Balkans & Romania	NBR_12
Ich_0386	This study	Croatia: Karlovac, Luka Pokupska	45.5204	15.6394	Northern Balkans & Romania	NBR_15
Ich_0381	This study	Croatia: Krbavsko polje, Kurjak	44.4865	15.7163	Central Balkans	CB_13
Ich_0384	This study	Croatia: Krbavsko polje, Laudonov gaj	44.6371	15.6677	Northern Balkans & Romania	NBR_17
Ich_0380	This study	Croatia: Krbavsko polje, Mutilići, ribnjak	44.5106	15.7678	Central Balkans	CB_13
Ich_0385	This study	Croatia: Krbavsko polje, Podlapača, izvor Zvijezda	44.5974	15.6299	Northern Balkans & Romania	NBR_17
Ich_0379	This study	Croatia: Žumberak, Jurkovo Selo	45.7037	15.4587	Northern Balkans & Romania	NBR_16
Ich_0383	This study	Croatia: Žumberak, Koretići, PD Scout	45.7981	15.5501	Northern Balkans & Romania	NBR_14
swab_0883	This study	England: Chorleywood Common	51.6603	-0.510418	Eastern/Western Europe & Spain	EWES_1
swab_0885	This study	England: Chorleywood Common	51.6603	-0.510418	Eastern/Western Europe & Spain	EWES_1
swab _0886	This study	England: Chorleywood Common	51.6603	-0.510418	Eastern/Western Europe & Spain	EWES_1
swab_0887	This study	England: Chorleywood Common	51.6603	-0.510418	Eastern/Western Europe & Spain	EWES_1
swab_0888	This study	England: Chorleywood Common	51.6603	-0.510418	Eastern/Western Europe & Spain	EWES_1
swab_0889	This study	England: Peterley Wood Farm	51.6865	-0.726986	Eastern/Western Europe & Spain	EWES_1
swab_0894	This study	England: Peterley Wood Farm	51.6865	-0.726986	Italy	IT_7
swab_0852	This study	England: Tyler Hill	51.3082	1.06563	Italy	IT_7
swab_0853	This study	England: Tyler Hill	51.3082	1.06563	Italy	IT_7
swab_0854	This study	England: Tyler Hill	51.3082	1.06563	Italy	IT_7
swab_0855	This study	England: Tyler Hill	51.3082	1.06563	Italy	IT_7
swab_0856	This study	England: Tyler Hill	51.3082	1.06563	Italy	IT_7
Ich_0302	This study	France: Chamechaude	45.298	5.75	Eastern/Western Europe & Spain	EWES_1
Ich_0303	This study	France: Chamechaude	45.298	5.75	Eastern/Western Europe & Spain	EWES_1
Ich_0304	This study	France: Chamechaude	45.298	5.75	Eastern/Western Europe & Spain	EWES_1
Ich_0305	This study	France: Chamechaude	45.298	5.75	Eastern/Western Europe & Spain	EWES_1
Ich_0469	This study	France: Billiat	46.071	5.78238	Eastern/Western Europe & Spain	EWES_1
Ich_0470	This study	France: Longes	45.5023	4.68268	Eastern/Western Europe & Spain	EWES_1
swab_0481	This study	Germany: Ahaus	52.0302	7.02729	Eastern/Western Europe & Spain	EWES_1
swab_0482	This study	Germany: Ahaus	52.033	7.03182	Eastern/Western Europe & Spain	EWES_1
swab_0483	This study	Germany: Ahaus	52.033	7.03182	Eastern/Western Europe & Spain	EWES_1
swab_0494	This study	Germany: Borken	51.8549	6.78048	Eastern/Western Europe & Spain	EWES_1
swab_0495	This study	Germany: Borken	51.8549	6.78048	Eastern/Western Europe & Spain	EWES_16
swab_0496	This study	Germany: Borken	51.8549	6.78048	Eastern/Western Europe & Spain	EWES_1
Ich_0285	This study	Germany: Hohenhole	49.31	9.588	Eastern/Western Europe & Spain	EWES_11
Ich_0286	This study	Germany: Hohenhole	49.31	9.588	Eastern/Western Europe & Spain	EWES_11
swab_0698	This study	Germany: Pfalzerwald. Hollerbach	49.2959	8.0017	Eastern/Western Europe & Spain	EWES_1
swab_0685	This study	Germany: Pfalzerwald. Ziegelbach	49.218	8.02163	Eastern/Western Europe & Spain	EWES_1
Ich_0281	This study	Germany: Schönau am Königssee	47.615	12.978	Eastern/Western Europe & Spain	EWES_1
Ich_0282	This study	Germany: Schönau am Königssee	47.615	12.978	Eastern/Western Europe & Spain	EWES_1
Ich_0283	This study	Germany: Schönau am Königssee	47.615	12.978	Eastern/Western Europe & Spain	EWES_13
swab_0489	This study	Germany: Stadtlohn	51.9957	6.93482	Eastern/Western Europe & Spain	EWES_1
swab_0491	This study	Germany: Stadtlohn	51.9957	6.93482	Eastern/Western Europe & Spain	EWES_16
Ich_0094	This study	Greece: Delvinaki	39.9522	20.4846	Southern Balkans	SB_4
Ich_0103	This study	Greece: Kalavryta	38.0227	22.0996	Southern Balkans	SB_3
Ich_0088	This study	Greece: Lakmos Mt	39.7154	21.1956	Southern Balkans	SB_2
Ich_0092	This study	Greece: Palio Mikro Chorio	38.8324	21.7207	Southern Balkans	SB_1
Ich_0090	This study	Greece: Smolikas Mt	40.1351	20.9105	Southern Balkans	SB_5
Ich_0097	This study	Greece: Tymphi Mt - 1	39.931	20.81	Southern Balkans	SB_4
Ich_0101	This study	Greece: Vasilitsa Mt.	40.046	21.091	Southern Balkans	SB_6
Ich_0070	This study	Hungary: Felsoszolnok	46.8622	16.1456	Eastern/Western Europe & Spain	EWES_6
Ich_0296	This study	Hungary: Mátraszentimre	47.93	19.86	Eastern/Western Europe & Spain	EWES_4
Ich_0291	This study	Hungary: Szakonyfalu	46.91	16.23	Eastern/Western Europe & Spain	EWES_6
Swab_0809	This study	Ireland: undisclosed site 1	withheld	withheld	Eastern/Western Europe & Spain	EWES_38
Swab_0810	This study	Ireland: undisclosed site 1	withheld	withheld	Eastern/Western Europe & Spain	EWES_38
Swab_0811	This study	Ireland: undisclosed site 1	withheld	withheld	Eastern/Western Europe & Spain	EWES_38
Swab_0812	This study	Ireland: undisclosed site 1	withheld	withheld	Eastern/Western Europe & Spain	EWES_38
Swab_0813	This study	Ireland: undisclosed site 1	withheld	withheld	Eastern/Western Europe & Spain	EWES_38
Swab_0815	This study	Ireland: undisclosed site 1	withheld	withheld	Eastern/Western Europe & Spain	EWES_38
Swab_0816	This study	Ireland: undisclosed site 1	withheld	withheld	Eastern/Western Europe & Spain	EWES_38
Swab_0817	This study	Ireland: undisclosed site 1	withheld	withheld	Eastern/Western Europe & Spain	EWES_38
Swab_0818	This study	Ireland: undisclosed site 1	withheld	withheld	Eastern/Western Europe & Spain	EWES_38
Swab_0819	This study	Ireland: undisclosed site 2	withheld	withheld	Eastern/Western Europe & Spain	EWES_38
Swab_0822	This study	Ireland: undisclosed site 2	withheld	withheld	Eastern/Western Europe & Spain	EWES_38
Swab_0823	This study	Ireland: undisclosed site 2	withheld	withheld	Eastern/Western Europe & Spain	EWES_38
Ich_0245	This study	Italy: Borgo rozza	46.3263	13.1396	Eastern/Western Europe & Spain	EWES_17
Ich_0246	This study	Italy: Borgo rozza	46.326	13.14	Eastern/Western Europe & Spain	EWES_17
Ich_0247	This study	Italy: Borgo rozza	46.326	13.14	Eastern/Western Europe & Spain	EWES_24
Ich_0197	This study	Italy: Iesa	43.0833	11.2333	Italy	IT_7
Ich_0209	This study	Italy: Madonna del Lago	44.1167	7.98333	Italy	IT_6
Ich_0251	This study	Italy: Malga ungarina	46.341	13.2017	Eastern/Western Europe & Spain	EWES_24
Ich_0252	This study	Italy: Malga ungarina	46.341	13.202	Eastern/Western Europe & Spain	EWES_24
Ich_0253	This study	Italy: Malga ungarina	46.341	13.202	Eastern/Western Europe & Spain	EWES_17
Ich_0224	This study	Italy: Pecetto Torinese	45.0333	7.71667	Italy	IT_1
Ich_0260	This study	Italy: Robidisce	46.2126	13.4135	Eastern/Western Europe & Spain	EWES_19
Ich_0261	This study	Italy: Robidisce	46.213	13.413	Eastern/Western Europe & Spain	EWES_17
Ich_0262	This study	Italy: Robidisce	46.213	13.413	Eastern/Western Europe & Spain	EWES_26
Ich_0248	This study	Italy: Socchieve melaris	46.408	12.833	Eastern/Western Europe & Spain	EWES_1
Ich_0249	This study	Italy: Socchieve melaris	46.408	12.833	Eastern/Western Europe & Spain	EWES_1
Ich_0250	This study	Italy: Socchieve melaris	46.408	12.833	Eastern/Western Europe & Spain	EWES_1
Ich_0128	This study	Montenegro: Ćetni Do	42.6417	19.1925	Montenegro	MONT_1
Ich_0125	This study	Montenegro: Donja Trepča	42.8186	18.7784	Central Balkans	CB_10
Ich_0182	This study	Montenegro: Glavica	42.8187	18.6338	Montenegro	MONT_3
Ich_0136	This study	Montenegro: Hercegova Luka	42.9817	18.5775	Montenegro	MONT_3
Ich_0130	This study	Montenegro: Ponikvica	42.6718	19.2541	Montenegro	MONT_1
Ich_0131	This study	Montenegro: Ponikvica	42.6718	19.2541	Montenegro	MONT_6
Ich_0132	This study	Montenegro: Ponikvica	42.6718	19.2541	Montenegro	MONT_1
Ich_0134	This study	Montenegro: Radovče	42.4405	19.2654	Montenegro	MONT_1
Ich_0135	This study	Montenegro: Radovče	42.4405	19.2654	Montenegro	MONT_1
Ich_0159	This study	Montenegro: Vilusi: Pilatovci	42.8631	18.5215	Montenegro	MONT_3
swab_0788	This study	Netherlands: Amen	52.9431	6.6127	Eastern/Western Europe & Spain	EWES_1
swab_0789	This study	Netherlands: Amen	52.9431	6.6127	Eastern/Western Europe & Spain	EWES_1
swab_0790	This study	Netherlands: Amen	52.9431	6.6127	Eastern/Western Europe & Spain	EWES_1
swab_0646	This study	Netherlands: Amsterdam	52.3496	4.93585	Eastern/Western Europe & Spain	EWES_1
swab_0647	This study	Netherlands: Amsterdam	52.3496	4.93585	Eastern/Western Europe & Spain	EWES_1
swab_0672	This study	Netherlands: Amsterdam	52.3558	4.93735	Eastern/Western Europe & Spain	EWES_1
swab_0673	This study	Netherlands: Amsterdam	52.3558	4.93735	Eastern/Western Europe & Spain	EWES_1
swab_0674	This study	Netherlands: Amsterdam	52.3558	4.93735	Eastern/Western Europe & Spain	EWES_1
swab_0532	This study	Netherlands: Apenheul	52.2137	5.91925	Northern Balkans & Romania	NBR_12
swab_0668	This study	Netherlands: Assen	52.979	6.55991	Eastern/Western Europe & Spain	EWES_1
swab_0669	This study	Netherlands: Assen	52.9943	6.55583	Eastern/Western Europe & Spain	EWES_1
swab_0670	This study	Netherlands: Assen	52.9943	6.55583	Eastern/Western Europe & Spain	EWES_1
swab_0671	This study	Netherlands: Assen	52.9943	6.55583	Eastern/Western Europe & Spain	EWES_1
swab_0554	This study	Netherlands: Baarle-Nassau, Broskens	51.4159	4.89143	Eastern/Western Europe & Spain	EWES_1
swab_0555	This study	Netherlands: Baarle-Nassau, Broskens	51.4159	4.89143	Eastern/Western Europe & Spain	EWES_1
swab_0556	This study	Netherlands: Baarle-Nassau, Princevelden	51.4113	4.903	Eastern/Western Europe & Spain	EWES_1
swab_0557	This study	Netherlands: Baarle-Nassau, Princevelden	51.4113	4.903	Eastern/Western Europe & Spain	EWES_1
swab_0558	This study	Netherlands: Baarle-Nassau, Princevelden	51.4113	4.903	Eastern/Western Europe & Spain	EWES_1
swab_0563	This study	Netherlands: Bollenveen Zeijen	53.0525	6.52739	Eastern/Western Europe & Spain	EWES_1
swab_0441	This study	Netherlands: Boskoop	52.0742	4.64001	Eastern/Western Europe & Spain	EWES_1
swab_0442	This study	Netherlands: Boskoop	52.0742	4.64001	Eastern/Western Europe & Spain	EWES_1
swab_0443	This study	Netherlands: Boskoop	52.0742	4.64001	Eastern/Western Europe & Spain	EWES_1
swab_0539	This study	Netherlands: Cottessen	50.757	5.93468	Eastern/Western Europe & Spain	EWES_1
swab_0541	This study	Netherlands: Cottessen	50.757	5.93468	Eastern/Western Europe & Spain	EWES_20
swab_0682	This study	Netherlands: de Gooren en Krochten	51.445	4.6597	Eastern/Western Europe & Spain	EWES_1
swab_0683	This study	Netherlands: de Gooren en Krochten	51.445	4.6597	Eastern/Western Europe & Spain	EWES_1
swab_0564	This study	Netherlands: De Haar Assen	52.9498	6.51276	Eastern/Western Europe & Spain	EWES_1
swab_0565	This study	Netherlands: De Haar Assen	52.9498	6.51276	Eastern/Western Europe & Spain	EWES_1
swab_0881	This study	Netherlands: De Kaaistoep, Blaak-West	51.5483	5.03262	Eastern/Western Europe & Spain	EWES_1
swab_0331	This study	Netherlands: Den Haag	52.1	4.279	Eastern/Western Europe & Spain	EWES_1
swab_0332	This study	Netherlands: Den Haag	52.1	4.279	Eastern/Western Europe & Spain	EWES_1
swab_0333	This study	Netherlands: Den Haag	52.1	4.279	Eastern/Western Europe & Spain	EWES_1
swab_0805	This study	Netherlands: Den Haag 2	52.087	4.341	Eastern/Western Europe & Spain	EWES_1
swab_0806	This study	Netherlands: Den Haag 2	52.087	4.341	Eastern/Western Europe & Spain	EWES_1
swab_0661	This study	Netherlands: Driestruik	51.1657	6.03928	Eastern/Western Europe & Spain	EWES_14
swab_0662	This study	Netherlands: Driestruik	51.1657	6.03928	Eastern/Western Europe & Spain	EWES_14
swab_0660	This study	Netherlands: Driestruik	51.1657	6.03927	Eastern/Western Europe & Spain	EWES_1
swab_0663	This study	Netherlands: Driestruik	51.1657	6.03927	Eastern/Western Europe & Spain	EWES_1
swab_0808	This study	Netherlands: Eindhoven	51.4618	5.44299	Eastern/Western Europe & Spain	EWES_10
swab_0287	This study	Netherlands: Emmen	52.786	6.889	Eastern/Western Europe & Spain	EWES_1
swab_0288	This study	Netherlands: Emmen	52.781	6.888	Eastern/Western Europe & Spain	EWES_1
swab_0574	This study	Netherlands: Evides Halsteren	51.5283	4.26785	Eastern/Western Europe & Spain	EWES_1
swab_0289	This study	Netherlands: Gastel	51.288	5.54	Eastern/Western Europe & Spain	EWES_14
swab_0709	This study	Netherlands: Gijzenrooi	51.4152	5.5187	Eastern/Western Europe & Spain	EWES_10
swab_0710	This study	Netherlands: Gijzenrooi	51.4152	5.5187	Eastern/Western Europe & Spain	EWES_10
swab_0878	This study	Netherlands: Gilze	51.5498	4.94467	Eastern/Western Europe & Spain	EWES_22
swab_0879	This study	Netherlands: Gilze	51.5498	4.94467	Eastern/Western Europe & Spain	EWES_22
swab_0712	This study	Netherlands: Goes	51.505	3.898	Eastern/Western Europe & Spain	EWES_1
swab_0713	This study	Netherlands: Goes	51.505	3.898	Eastern/Western Europe & Spain	EWES_1
swab_0714	This study	Netherlands: Goes	51.505	3.898	Eastern/Western Europe & Spain	EWES_1
swab_0542	This study	Netherlands: Golfbaan Brunssummerheide	50.9358	6.00454	Eastern/Western Europe & Spain	EWES_1
swab_0543	This study	Netherlands: Golfbaan Brunssummerheide	50.9358	6.00454	Eastern/Western Europe & Spain	EWES_1
swab_0544	This study	Netherlands: Golfbaan Brunssummerheide	50.9358	6.00454	Eastern/Western Europe & Spain	EWES_1
swab_0578	This study	Netherlands: Hellemonsdreef Rucphen	51.5363	4.52203	Eastern/Western Europe & Spain	EWES_1
swab_0579	This study	Netherlands: Hellemonsdreef Rucphen	51.5363	4.52203	Eastern/Western Europe & Spain	EWES_1
swab_0609	This study	Netherlands: Het Hurkske	51.5826	5.635	Eastern/Western Europe & Spain	EWES_10
swab_0610	This study	Netherlands: Het Hurkske	51.5826	5.635	Eastern/Western Europe & Spain	EWES_10
swab_0548	This study	Netherlands: Holterberg	52.2972	6.42474	Eastern/Western Europe & Spain	EWES_21
swab_0549	This study	Netherlands: Holterberg	52.2972	6.42474	Eastern/Western Europe & Spain	EWES_21
swab_0550	This study	Netherlands: Holterberg	52.2972	6.42474	Eastern/Western Europe & Spain	EWES_21
swab_0619	This study	Netherlands: Hoog Buurlosche Heide	52.1658	5.84476	Northern Balkans & Romania	NBR_12
swab_0620	This study	Netherlands: Hoog Buurlosche Heide	52.1658	5.84476	Eastern/Western Europe & Spain	EWES_1
swab_0621	This study	Netherlands: Hoog Buurlosche Heide	52.1658	5.84476	Northern Balkans & Romania	NBR_12
swab_0766	This study	Netherlands: Hoog Buurlosche Heide	52.1658	5.84476	Northern Balkans & Romania	NBR_12
swab_0206	This study	Netherlands: Hortus Leiden	52.155	4.484	Eastern/Western Europe & Spain	EWES_1
swab_0207	This study	Netherlands: Hortus Leiden	52.155	4.484	Eastern/Western Europe & Spain	EWES_1
swab_0208	This study	Netherlands: Hortus Leiden	52.155	4.484	Eastern/Western Europe & Spain	EWES_1
swab_0797	This study	Netherlands: Kamp Nieuw Milligen	52.2222	5.76616	Northern Balkans & Romania	NBR_12
swab_0799	This study	Netherlands: Kamp Nieuw Milligen	52.2222	5.76616	Northern Balkans & Romania	NBR_12
swab_0800	This study	Netherlands: Kamp Nieuw Milligen	52.2222	5.76616	Northern Balkans & Romania	NBR_12
swab_0728	This study	Netherlands: Kootwijk/ Nieuw- Milligen blusvijver	52.2072	5.78806	Northern Balkans & Romania	NBR_12
swab_0729	This study	Netherlands: Kootwijk/ Nieuw- Milligen blusvijver	52.2072	5.78806	Northern Balkans & Romania	NBR_12
swab_0730	This study	Netherlands: Kootwijk/ Nieuw- Milligen blusvijver	52.2072	5.78806	Northern Balkans & Romania	NBR_12
swab_0731	This study	Netherlands: Kootwijk/ Nieuw- Milligen blusvijver	52.2072	5.78806	Northern Balkans & Romania	NBR_12
swab_0732	This study	Netherlands: Kootwijk/ Nieuw- Milligen blusvijver	52.2072	5.78806	Central Balkans	CB_6
swab_0613	This study	Netherlands: Korteven	51.4473	4.31755	Eastern/Western Europe & Spain	EWES_1
swab_0614	This study	Netherlands: Korteven	51.4473	4.31755	Eastern/Western Europe & Spain	EWES_1
swab_0615	This study	Netherlands: Korteven	51.4473	4.31755	Eastern/Western Europe & Spain	EWES_1
swab_0469	This study	Netherlands: Krimpen a/d IJssel	51.9222	4.60384	Eastern/Western Europe & Spain	EWES_1
swab_0470	This study	Netherlands: Krimpen a/d IJssel	51.9222	4.60384	Eastern/Western Europe & Spain	EWES_1
swab_0471	This study	Netherlands: Krimpen a/d IJssel	51.9222	4.60384	Eastern/Western Europe & Spain	EWES_1
swab_0681	This study	Netherlands: Kroondomijnen. Alverenschotenseweg	52.192	5.8444	Northern Balkans & Romania	NBR_12
swab_0676	This study	Netherlands: Kroondomijnen. ecoduct Hoog Buurlo	52.1887	5.85601	Northern Balkans & Romania	NBR_12
swab_0575	This study	Netherlands: Laagveld Rucphen	51.5407	4.59969	Eastern/Western Europe & Spain	EWES_1
swab_0576	This study	Netherlands: Laagveld Rucphen	51.5407	4.59969	Eastern/Western Europe & Spain	EWES_1
swab_0577	This study	Netherlands: Laagveld Rucphen	51.5407	4.59969	Eastern/Western Europe & Spain	EWES_1
swab_0599	This study	Netherlands: Landgoed De Utrecht	51.4335	5.13958	Eastern/Western Europe & Spain	EWES_1
swab_0600	This study	Netherlands: Landgoed De Utrecht	51.4347	5.15653	Eastern/Western Europe & Spain	EWES_1
swab_0601	This study	Netherlands: Landgoed De Utrecht	51.4424	5.17096	Eastern/Western Europe & Spain	EWES_1
swab_0581	This study	Netherlands: Langeschouw	51.4829	4.53922	Eastern/Western Europe & Spain	EWES_23
swab_0582	This study	Netherlands: Langeschouw	51.4829	4.53922	Eastern/Western Europe & Spain	EWES_23
swab_0583	This study	Netherlands: Langeschouw	51.4829	4.53922	Eastern/Western Europe & Spain	EWES_23
swab_0849	This study	Netherlands: Lelystad	52.5084	5.4899	Eastern/Western Europe & Spain	EWES_1
swab_0850	This study	Netherlands: Lelystad	52.5084	5.4899	Eastern/Western Europe & Spain	EWES_1
swab_0851	This study	Netherlands: Lelystad	52.5084	5.4899	Eastern/Western Europe & Spain	EWES_1
swab_0175	This study	Netherlands: Liesbos	51.587	4.705	Eastern/Western Europe & Spain	EWES_1
swab_0177	This study	Netherlands: Liesbos	51.583	4.688	Eastern/Western Europe & Spain	EWES_1
swab_0178	This study	Netherlands: Liesbos	51.587	4.705	Eastern/Western Europe & Spain	EWES_1
swab_0874	This study	Netherlands: Meinweg, wit venneke	51.1648	6.09039	Eastern/Western Europe & Spain	EWES_1
swab_0876	This study	Netherlands: Meinweg, wit venneke	51.1648	6.09039	Eastern/Western Europe & Spain	EWES_1
Ich_0278	This study	Netherlands: Molenven, Waalre	51.386	5.461	Eastern/Western Europe & Spain	EWES_10
Ich_0279	This study	Netherlands: Molenven, Waalre	51.386	5.461	Eastern/Western Europe & Spain	EWES_10
Ich_0280	This study	Netherlands: Molenven, Waalre	51.386	5.461	Eastern/Western Europe & Spain	EWES_10
swab_0664	This study	Netherlands: Nationaal Park de Meinweg, Vlodorp Station	51.1546	6.1673	Eastern/Western Europe & Spain	EWES_1
swab_0665	This study	Netherlands: Nationaal Park de Meinweg, Vlodorp Station	51.1546	6.1673	Eastern/Western Europe & Spain	EWES_1
swab_0666	This study	Netherlands: Nationaal Park de Meinweg, Vlodorp Station	51.1546	6.1673	Eastern/Western Europe & Spain	EWES_1
swab_0656	This study	Netherlands: Nationaal Park de Meinweg, Vlohopperven	51.1514	6.12503	Eastern/Western Europe & Spain	EWES_1
swab_0657	This study	Netherlands: Nationaal Park de Meinweg, Vlohopperven	51.1514	6.12503	Eastern/Western Europe & Spain	EWES_1
swab_0658	This study	Netherlands: Nationaal Park de Meinweg, Vlohopperven	51.1514	6.12503	Eastern/Western Europe & Spain	EWES_1
swab_0455	This study	Netherlands: Nieuw-Lekkerland	51.8859	4.6648	Eastern/Western Europe & Spain	EWES_1
swab_0456	This study	Netherlands: Nieuw-Lekkerland	51.8859	4.6648	Eastern/Western Europe & Spain	EWES_1
swab_0457	This study	Netherlands: Nieuw-Lekkerland	51.8859	4.6648	Eastern/Western Europe & Spain	EWES_1
swab_0715	This study	Netherlands: Noorderheide	52.305	5.81881	Northern Balkans & Romania	NBR_12
swab_0716	This study	Netherlands: Noorderheide	52.305	5.81881	Northern Balkans & Romania	NBR_12
swab_0717	This study	Netherlands: Noorderheide	52.305	5.81881	Northern Balkans & Romania	NBR_12
swab_0718	This study	Netherlands: Noorderheide	52.305	5.81881	Northern Balkans & Romania	NBR_12
swab_0719	This study	Netherlands: Noorderheide	52.305	5.81881	Northern Balkans & Romania	NBR_12
swab_0720	This study	Netherlands: Noorderheide	52.305	5.81881	Northern Balkans & Romania	NBR_12
swab_0521	This study	Netherlands: Noordwolde	52.8852	6.15252	Eastern/Western Europe & Spain	EWES_1
swab_0523	This study	Netherlands: Noordwolde	52.8848	6.15079	Eastern/Western Europe & Spain	EWES_1
swab_0522	This study	Netherlands: Noordwolde	52.8851	6.15191	Eastern/Western Europe & Spain	EWES_1
swab_0524	This study	Netherlands: Noordwolde	52.8845	6.15177	Eastern/Western Europe & Spain	EWES_1
swab_0801	This study	Netherlands: Orvelte	52.8433	6.6536	Eastern/Western Europe & Spain	EWES_1
swab_0284	This study	Netherlands: Oudeland	51.929	4.669	Italy	IT_7
swab_0285	This study	Netherlands: Oudeland	51.929	4.669	Eastern/Western Europe & Spain	EWES_1
swab_0286	This study	Netherlands: Oudeland	51.929	4.669	Eastern/Western Europe & Spain	EWES_1
swab_0588	This study	Netherlands: Rissebeek, Roosendaal	51.5096	4.4297	Eastern/Western Europe & Spain	EWES_1
swab_0589	This study	Netherlands: Rissebeek, Roosendaal	51.5096	4.4297	Eastern/Western Europe & Spain	EWES_1
swab_0568	This study	Netherlands: Roosendaal	51.5193	4.48251	Eastern/Western Europe & Spain	EWES_1
swab_0569	This study	Netherlands: Roosendaal	51.5193	4.48251	Eastern/Western Europe & Spain	EWES_1
swab_0570	This study	Netherlands: Roosendaal	51.5193	4.48251	Eastern/Western Europe & Spain	EWES_1
swab_0533	This study	Netherlands: Schinveld	50.9719	6.01369	Eastern/Western Europe & Spain	EWES_1
swab_0534	This study	Netherlands: Schinveld	50.9719	6.01369	Eastern/Western Europe & Spain	EWES_1
swab_0535	This study	Netherlands: Schinveld	50.9719	6.01369	Eastern/Western Europe & Spain	EWES_1
swab_0559	This study	Netherlands: Ulicoten, Withagen	51.4472	4.82911	Eastern/Western Europe & Spain	EWES_22
swab_0560	This study	Netherlands: Ulicoten, Withagen	51.4472	4.82911	Eastern/Western Europe & Spain	EWES_1
swab_0561	This study	Netherlands: Ulicoten, Withagen	51.4472	4.82911	Eastern/Western Europe & Spain	EWES_22
swab_0770	This study	Netherlands: Veghel	51.6201	5.55391	Eastern/Western Europe & Spain	EWES_1
swab_0771	This study	Netherlands: Veghel	51.6201	5.55391	Eastern/Western Europe & Spain	EWES_1
swab_0740	This study	Netherlands: Veluwe. Assel. De Watergang	52.203	5.808	Northern Balkans & Romania	NBR_12
swab_0741	This study	Netherlands: Veluwe. Assel. De Watergang	52.203	5.808	Northern Balkans & Romania	NBR_12
swab_0742	This study	Netherlands: Veluwe. Assel. De Watergang	52.203	5.808	Northern Balkans & Romania	NBR_12
swab_0743	This study	Netherlands: Veluwe, Assel, De Watergang	52.203	5.808	Northern Balkans & Romania	NBR_12
swab_0755	This study	Netherlands: Veluwe. Doorwerth. Landgoed Duno	51.9694	5.80313	Eastern/Western Europe & Spain	EWES_1
swab_0756	This study	Netherlands: Veluwe. Doorwerth. Landgoed Duno	51.9694	5.80313	Eastern/Western Europe & Spain	EWES_1
swab_0757	This study	Netherlands: Veluwe. Doorwerth. Landgoed Duno	51.9694	5.80313	Eastern/Western Europe & Spain	EWES_1
swab_0758	This study	Netherlands: Veluwe, Doorwerth, Landgoed Duno	51.9694	5.80313	Eastern/Western Europe & Spain	EWES_1
swab_0759	This study	Netherlands: Veluwe, Doorwerth, Landgoed Duno	51.9694	5.80313	Eastern/Western Europe & Spain	EWES_1
swab_0744	This study	Netherlands: Veluwe. Radio Kootwijk	52.1742	5.81944	Northern Balkans & Romania	NBR_12
swab_0745	This study	Netherlands: Veluwe. Radio Kootwijk	52.1742	5.81944	Northern Balkans & Romania	NBR_12
swab_0746	This study	Netherlands: Veluwe. Radio Kootwijk	52.1742	5.81944	Northern Balkans & Romania	NBR_12
swab_0747	This study	Netherlands: Veluwe, Radio Kootwijk	52.1742	5.81944	Northern Balkans & Romania	NBR_12
swab_0748	This study	Netherlands: Veluwe, Radio Kootwijk	52.1742	5.81944	Northern Balkans & Romania	NBR_12
swab_0749	This study	Netherlands: Veluwe, Radio Kootwijk	52.1742	5.81944	Northern Balkans & Romania	NBR_12
swab_0764	This study	Netherlands: Veluwe. Vrome Bergen	52.2101	5.81277	Northern Balkans & Romania	NBR_12
swab_0566	This study	Netherlands: Vledderveen	52.8716	6.19013	Eastern/Western Europe & Spain	EWES_1
swab_0590	This study	Netherlands: Waayenberg Zundert	51.4665	4.69778	Eastern/Western Europe & Spain	EWES_28
swab_0594	This study	Netherlands: Waayenberg Zundert	51.4614	4.69728	Eastern/Western Europe & Spain	EWES_28
swab_0592	This study	Netherlands: Waayenberg Zundert	51.4665	4.69778	Eastern/Western Europe & Spain	EWES_20
swab_0794	This study	Netherlands: Wageningen	51.9707	5.69384	Eastern/Western Europe & Spain	EWES_1
swab_0795	This study	Netherlands: Wageningen	51.9707	5.69384	Eastern/Western Europe & Spain	EWES_1
swab_0796	This study	Netherlands: Wageningen	51.9707	5.69384	Eastern/Western Europe & Spain	EWES_1
swab_0750	This study	Netherlands: Watergraafsmeertje	52.21	5.68221	Northern Balkans & Romania	NBR_12
swab_0751	This study	Netherlands: Watergraafsmeertje	52.21	5.68221	Northern Balkans & Romania	NBR_12
swab_0752	This study	Netherlands: Watergraafsmeertje	52.21	5.68221	Northern Balkans & Romania	NBR_12
swab_0753	This study	Netherlands: Watergraafsmeertje	52.21	5.68221	Northern Balkans & Romania	NBR_12
swab_0754	This study	Netherlands: Watergraafsmeertje	52.21	5.68221	Northern Balkans & Romania	NBR_12
swab_0623	This study	Netherlands: Wekeromse Zand	52.103	5.67725	Eastern/Western Europe & Spain	EWES_1
swab_0793	This study	Netherlands: Wekeromse Zand	52.103	5.67725	Eastern/Western Europe & Spain	EWES_1
swab_0501	This study	Netherlands: Winterswijk Woold	51.9044	6.73632	Eastern/Western Europe & Spain	EWES_1
swab_0502	This study	Netherlands: Winterswijk Woold	51.9006	6.73184	Eastern/Western Europe & Spain	EWES_1
swab_0503	This study	Netherlands: Winterswijk Woold	51.9042	6.73456	Eastern/Western Europe & Spain	EWES_1
swab_0572	This study	Netherlands: Wouwse Plantage	51.4759	4.4187	Eastern/Western Europe & Spain	EWES_1
swab_0573	This study	Netherlands: Wouwse Plantage	51.4759	4.4187	Eastern/Western Europe & Spain	EWES_1
Swab_0832	This study	Northern Ireland: undisclosed site 1	withheld	withheld	Eastern/Western Europe & Spain	EWES_38
swab_0835	This study	Northern Ireland: undisclosed site 1	withheld	withheld	Eastern/Western Europe & Spain	EWES_38
swab_0836	This study	Northern Ireland: undisclosed site 1	withheld	withheld	Eastern/Western Europe & Spain	EWES_38
swab_0838	This study	Northern Ireland: undisclosed site 1	withheld	withheld	Eastern/Western Europe & Spain	EWES_38
swab_0839	This study	Northern Ireland: undisclosed site 1	withheld	withheld	Eastern/Western Europe & Spain	EWES_38
swab_0840	This study	Northern Ireland: undisclosed site 1	withheld	withheld	Eastern/Western Europe & Spain	EWES_38
swab_0841	This study	Northern Ireland: undisclosed site 1	withheld	withheld	Eastern/Western Europe & Spain	EWES_38
Ich_0064	This study	Poland: Burgrabice	50.3322	17.2812	Eastern/Western Europe & Spain	EWES_1
Ich_0045	This study	Poland: Leszczawa Dolna -zielony szlak	49.6655	22.4428	Eastern/Western Europe & Spain	EWES_29
Ich_0075	This study	Poland: Piechowice	50.8575	15.6315	Eastern/Western Europe & Spain	EWES_1
Ich_0015	This study	Poland: Rzyki	49.7756	19.3952	Eastern/Western Europe & Spain	EWES_4
Ich_0069	This study	Poland: Wola Rzeplińska	49.8979	22.3859	Eastern/Western Europe & Spain	EWES_4
Ich_0055	This study	Romania: Borzont	46.7314	25.3608	Eastern/Western Europe & Spain	EWES_4
Ich_0053	This study	Romania: Camp Cetatii	46.7036	25.0686	Eastern/Western Europe & Spain	EWES_4
Ich_0054	This study	Romania: Gheorgheni hotel	46.7474	25.6723	Eastern/Western Europe & Spain	EWES_4
Ich_0051	This study	Romania: Larga	46.844	24.9464	Eastern/Western Europe & Spain	EWES_4
Ich_0398	This study	Romania: Leresti	45.4341	24.9986	Northern Balkans & Romania	NBR_8
Ich_0402	This study	Romania: Penteleu	45.599	26.4128	Eastern/Western Europe & Spain	EWES_4
Ich_0078	This study	Romania: Riu Mare campground	45.4351	22.4562	Northern Balkans & Romania	NBR_13
Ich_0076	This study	Romania: Sinaia	45.332	25.553	Northern Balkans & Romania	NBR_8
Ich_0288	This study	Romania: Vartop	46.51	22.66	Northern Balkans & Romania	NBR_9
swab_0843	This study	Scotland: Duddingston	55.9395	-3.16447	Eastern/Western Europe & Spain	EWES_1
swab_0844	This study	Scotland: Duddingston	55.9395	-3.16447	Eastern/Western Europe & Spain	EWES_1
swab_0845	This study	Scotland: Duddingston	55.9395	-3.16447	Eastern/Western Europe & Spain	EWES_1
swab_0846	This study	Scotland: Duddingston	55.9395	-3.16447	Eastern/Western Europe & Spain	EWES_1
swab_0847	This study	Scotland: Ratho	55.9226	-3.398	Eastern/Western Europe & Spain	EWES_1
Ich_0319	This study	Serbia: Bajina bašta. v. Gvozdac. Ružići	44.13	19.613	Central Balkans	CB_5
Ich_0161	This study	Serbia: Bosilegrad: Zli dol	42.459	22.4352	Central Balkans	CB_4
Ich_0162	This study	Serbia: Bosilegrad: Zli dol	42.459	22.4352	Central Balkans	CB_4
Ich_0149	This study	Serbia: Bukovik	43.4175	19.9949	Central Balkans	CB_11
Ich_0150	This study	Serbia: Bukovik	43.4175	19.9949	Central Balkans	CB_12
Ich_0163	This study	Serbia: Crna Trava	42.8099	22.299	Vlasina	VLAS_1
Ich_0183	This study	Serbia: Jarut	43.0647	20.2449	Montenegro	MONT_2
Ich_0151	This study	Serbia: Južni kučaj	44.0855	21.8316	Central Balkans	CB_3
Ich_0152	This study	Serbia: Južni kučaj	44.0855	21.8316	Central Balkans	CB_3
Ich_0153	This study	Serbia: Južni kučaj	44.0855	21.8316	Central Balkans	CB_3
Ich_0166	This study	Serbia: Ljubovija: Gledeće	44.1938	19.3883	Central Balkans	CB_15
Ich_0168	This study	Serbia: Ljubovija: Gledeće	44.1938	19.3883	Central Balkans	CB_16
Ich_0169	This study	Serbia: Majdanpek: Debeli lug	44.3798	21.8776	Central Balkans	CB_3
Ich_0146	This study	Serbia: Okruglica lake	43.7162	20.277	Central Balkans	CB_11
Ich_0184	This study	Serbia: Valjevo: Gola glava	44.4023	19.8415	Central Balkans	CB_5
Ich_0192	This study	Serbia: Vlasina: Tumba	42.892	22.4221	Vlasina	VLAS_1
Ich_0193	This study	Serbia: Vranje: Devotin	42.4903	21.9013	Central Balkans	CB_4
Ich_0433	This study	Slovakia: Ziarska Chata	49.1814	19.7188	Eastern/Western Europe & Spain	EWES_4
Ich_0263	This study	Slovenia: Ajdovščina, Otlica	45.935	13.9229	Eastern/Western Europe & Spain	EWES_26
Ich_0264	This study	Slovenia: Ajdovščina, Otlica	45.935	13.9229	Eastern/Western Europe & Spain	EWES_15
Ich_0265	This study	Slovenia: Ajdovščina, Otlica	45.935	13.9229	Eastern/Western Europe & Spain	EWES_18
Ich_0445	This study	Slovenia: Črno jezero, Triglav lakes	46.2984	13.7954	Eastern/Western Europe & Spain	EWES_31
Ich_0446	This study	Slovenia: Črno jezero, Triglav lakes	46.2984	13.7954	Eastern/Western Europe & Spain	EWES_25
Ich_0447	This study	Slovenia: Črno jezero, Triglav lakes	46.2984	13.7954	Eastern/Western Europe & Spain	EWES_25
Ich_0266	This study	Slovenia: Col, Gozd	45.898	13.989	Eastern/Western Europe & Spain	EWES_15
Ich_0267	This study	Slovenia: Col, Gozd	45.898	13.989	Eastern/Western Europe & Spain	EWES_18
Ich_0268	This study	Slovenia: Col, Gozd	45.898	13.989	Eastern/Western Europe & Spain	EWES_15
Ich_0257	This study	Slovenia: Tolmin, Kanalski Lom	46.1103	13.7687	Eastern/Western Europe & Spain	EWES_18
Ich_0258	This study	Slovenia: Tolmin, Kanalski Lom	46.11	13.769	Eastern/Western Europe & Spain	EWES_26
Ich_0259	This study	Slovenia: Tolmin, Kanalski Lom	46.11	13.769	Eastern/Western Europe & Spain	EWES_18
Ich_0460	This study	Slovenia: Krvavi Kamen - Dom pri Gospodični	45.7688	15.3132	Northern Balkans & Romania	NBR_18
Ich_0461	This study	Slovenia: Krvavi Kamen - Trdinov vrh	45.77	15.3248	Eastern/Western Europe & Spain	EWES_32
Ich_0254	This study	Slovenia: Radovna, jezero Kreda	46.4167	13.9921	Eastern/Western Europe & Spain	EWES_25
Ich_0255	This study	Slovenia: Radovna, jezero Kreda	46.417	13.992	Eastern/Western Europe & Spain	EWES_27
Ich_0256	This study	Slovenia: Radovna, jezero Kreda	46.417	13.992	Eastern/Western Europe & Spain	EWES_27
Ich_0454	This study	Slovenia: Mala Lazna - Velika ledenica (ledena jama) v Paredani	45.9871	13.8377	Eastern/Western Europe & Spain	EWES_26
Ich_0455	This study	Slovenia: Mala Lazna - Velika ledenica (ledena jama) v Paredani	45.9871	13.8377	Eastern/Western Europe & Spain	EWES_26
Ich_0456	This study	Slovenia: Mala Lazna - Velika ledenica (ledena jama) v Paredani	45.9871	13.8377	Eastern/Western Europe & Spain	EWES_36
Ich_0457	This study	Slovenia: mlaka na planoti Banjšice	46.0395	13.7176	Eastern/Western Europe & Spain	EWES_36
Ich_0458	This study	Slovenia: mlaka na planoti Banjšice	46.0395	13.7176	Eastern/Western Europe & Spain	EWES_36
Ich_0459	This study	Slovenia: mlaka na planoti Banjšice	46.0395	13.7176	Eastern/Western Europe & Spain	EWES_35
Ich_0451	This study	Slovenia: Nova poljana, Biba Planina	46.2405	14.8488	Eastern/Western Europe & Spain	EWES_33
Ich_0452	This study	Slovenia: Nova poljana, Biba Planina	46.2473	14.841	Eastern/Western Europe & Spain	EWES_30
Ich_0453	This study	Slovenia: Nova poljana, Biba Planina	46.2459	14.8416	Eastern/Western Europe & Spain	EWES_30
Ich_0462	This study	Slovenia: Planinski dom (Muntain lodge) pri Gospodični - prelaz (pass) Vahta	45.7634	15.2956	Northern Balkans & Romania	NBR_18
Ich_0463	This study	Slovenia: Planinski dom (Muntain lodge) pri Gospodični - prelaz (pass) Vahta	45.757	15.2979	Northern Balkans & Romania	NBR_18
Ich_0448	This study	Slovenia: Žejski potok, Žejna dolina	45.9559	14.1491	Eastern/Western Europe & Spain	EWES_18
Ich_0449	This study	Slovenia: Žejski potok, Žejna dolina	45.946	14.1429	Eastern/Western Europe & Spain	EWES_18
Ich_0450	This study	Slovenia: Žejski potok, Žejna dolina	45.946	14.1429	Eastern/Western Europe & Spain	EWES_37
Ich_0442	This study	Slovenia: Zeleno jezero, Triglav lakes	46.3513	13.7948	Eastern/Western Europe & Spain	EWES_25
Ich_0443	This study	Slovenia: Zeleno jezero, Triglav lakes	46.3513	13.7948	Eastern/Western Europe & Spain	EWES_34
Ich_0444	This study	Slovenia: Zeleno jezero, Triglav lakes	46.3513	13.7948	Eastern/Western Europe & Spain	EWES_34
Ich_0275	This study	Spain: Siero, Asturias	43.434	-5.70211	Eastern/Western Europe & Spain	EWES_39
Ich_0274	This study	Spain: Sierra de Aralar. Navarra	42.9467	-1.84627	Eastern/Western Europe & Spain	EWES_42
Ich_0298	This study	Spain: Villar	43.4297	-5.57064	Eastern/Western Europe & Spain	EWES_39
Ich_0310	This study	Switzerland: Allaman	46.471	6.396	Eastern/Western Europe & Spain	EWES_1
Ich_0311	This study	Switzerland: Allaman	46.471	6.396	Eastern/Western Europe & Spain	EWES_1
Ich_0306	This study	Switzerland: Lucomagno	46.536	8.826	Eastern/Western Europe & Spain	EWES_12
Ich_0307	This study	Switzerland: Lucomagno	46.536	8.826	Eastern/Western Europe & Spain	EWES_12
Ich_0308	This study	Switzerland: Lucomagno	46.536	8.826	Eastern/Western Europe & Spain	EWES_12
Ich_0016	This study	Ukraine: Turyi Remety	48.721	22.555	Eastern/Western Europe & Spain	EWES_4
swab_0858	This study	Wales: Caerwedros 1	52.1694	-4.37024	Eastern/Western Europe & Spain	EWES_1
swab_0859	This study	Wales: Caerwedros 1	52.1694	-4.37024	Eastern/Western Europe & Spain	EWES_1
swab_0860	This study	Wales: Caerwedros 1	52.1694	-4.37024	Eastern/Western Europe & Spain	EWES_1
swab_0861	This study	Wales: Caerwedros 1	52.1694	-4.37024	Eastern/Western Europe & Spain	EWES_1
swab_0862	This study	Wales: Caerwedros 2	52.1604	-4.36977	Eastern/Western Europe & Spain	EWES_1
swab_0863	This study	Wales: Caerwedros 2	52.1604	-4.36977	Eastern/Western Europe & Spain	EWES_1
swab_0864	This study	Wales: Caerwedros 2	52.1604	-4.36977	Eastern/Western Europe & Spain	EWES_1
swab_0865	This study	Wales: Caerwedros 2	52.1604	-4.36977	Eastern/Western Europe & Spain	EWES_1
swab_0866	This study	Wales: Caerwedros 2	52.1604	-4.36977	Eastern/Western Europe & Spain	EWES_1
swab_0867	This study	Wales: Caerwedros 2	52.1604	-4.36977	Eastern/Western Europe & Spain	EWES_1
swab_0868	This study	Wales: Caerwedros 2	52.1604	-4.36977	Eastern/Western Europe & Spain	EWES_1
swab_0869	This study	Wales: Caerwedros 2	52.1604	-4.36977	Eastern/Western Europe & Spain	EWES_1
swab_0870	This study	Wales: Caerwedros 2	52.1604	-4.36977	Eastern/Western Europe & Spain	EWES_1
swab_0871	This study	Wales: Caerwedros 2	52.1604	-4.36977	Eastern/Western Europe & Spain	EWES_1
swab_0872	This study	Wales: Caerwedros 2	52.1604	-4.36977	Eastern/Western Europe & Spain	EWES_1
swab_0873	This study	Wales: Caerwedros 2	52.1604	-4.36977	Eastern/Western Europe & Spain	EWES_1
ND4 but shorter, newly generated in this study:
Ich_0347	This study	Bosnia and Herzegovina: Bihaæ	44.8202	15.8684	Northern Balkans & Romania	NBR_X
Ich_0426	This study	Bosnia and Herzegovina: Bojište	44.6875	16.4378	Northern Balkans & Romania	NBR_X
Ich_0348	This study	Bosnia and Herzegovina: Bosanska Krupa	44.8544	16.8226	Northern Balkans & Romania	NBR_X
Ich_0104	This study	Bosnia and Herzegovina: Čajniče	43.5568	19.0715	Central Balkans	CB_10
Ich_0105	This study	Bosnia and Herzegovina: Čajniče	43.5568	19.0715	Montenegro	MONT_2/5
Ich_0106	This study	Bosnia and Herzegovina: Čajniče	43.5568	19.0715	Montenegro	MONT_2/5
Ich_0360	This study	Bosnia and Herzegovina: Mt. Dinara	44.1062	16.3691	Central Balkans	CB_14
Ich_0361	This study	Bosnia and Herzegovina: Mt. Dinara	44.1062	16.3691	Central Balkans	CB_14
Ich_0362	This study	Bosnia and Herzegovina: Mt. Dinara	44.1062	16.3691	Central Balkans	CB_14
Ich_0375	This study	Bosnia and Herzegovina: Mt. Zelengora	43.368	18.593	Central Balkans	CB_10
Ich_0112	This study	Bosnia and Herzegovina: Perućica: Tjentište	43.3508	18.6879	Montenegro	MONT_X
Ich_0113	This study	Bosnia and Herzegovina: Perućica: Tjentište	43.3508	18.6879	Montenegro	MONT_X
Ich_0085	This study	Bulgaria: Bazovitsa	42.6115	22.5348	Vlasina	VLAS_1
Ich_0083	This study	Bulgaria: Bogdan	42.602	24.474	Central Balkans	CB_3/17
swab_0826	This study	England: Tyler Hill	51.3082	1.06563	Italy	IT_6/7
swab_0827	This study	England: Tyler Hill	51.3082	1.06563	Italy	IT_6/7
Ich_0046	This study	Germany: Harz near Langelsheim	51.9062	10.3332	Eastern/Western Europe & Spain	EWES_1/2/10/13/14/16/20/27/38
Swab_0765	This study	Hoog Buurlosche Heide	52.1658	5.84476	Eastern/Western Europe & Spain	EWES_1/2/10/13/14/16/20/27/38
Ich_0297	This study	Hungary: Bakonybél	47.26	17.67	Eastern/Western Europe & Spain	EWES_8/9/18/30/35/37
Ich_0231	This study	Italy: Camaldoli (2001)	43.8	11.8167	Italy	IT_6/7
Ich_0200	This study	Italy: Lago Greppo	44.1167	10.6667	Italy	IT_6/7
Ich_0203	This study	Italy: M.te Penna	44.4833	9.48333	Italy	IT_1
Ich_0212	This study	Italy: Monghidoro	44.2167	11.2833	Italy	IT_6/7
Ich_0233	This study	Italy: Montalto Uffugo	39.55	16.0167	Italy	IT_4
Ich_0241	This study	Italy: Monti della Laga (2008)	42.7	13.3167	Italy	IT_6/7
Ich_0194	This study	Italy: Torsoli	43.55	11.3833	Italy	IT_6/7
Ich_0139	This study	Montenegro: Bješkeća lake	42.6119	19.8408	Montenegro	MONT_1
Ich_0119	This study	Montenegro: Brštevac	42.9986	18.7197	Montenegro	MONT_2/5
Ich_0124	This study	Montenegro: Donja Trepča	42.8186	18.7784	Central Balkans	CB_10
Ich_0122	This study	Montenegro: Donje Crkvice	43.3089	18.905	Montenegro	MONT_1
Ich_0123	This study	Montenegro: Gornja Trepča	42.8311	18.7668	Central Balkans	CB_10
Ich_0126	This study	Montenegro: Gornje Crkvice: Turuntaš	42.9883	18.5561	Montenegro	MONT_1
Ich_0127	This study	Montenegro: Gornje Crkvice: Turuntaš	42.9883	18.5561	Montenegro	MONT_1
Ich_0120	This study	Montenegro: Kapetanovo lake	42.8224	19.2338	Montenegro	MONT_1
Ich_0155	This study	Montenegro: Seoca v.	42.2146	19.1385	Montenegro	MONT_1
Ich_0156	This study	Montenegro: Seoca v.	42.2146	19.1385	Montenegro	MONT_1
Ich_0157	This study	Montenegro: Vilusi: Koprivice v.	42.9516	18.5911	Central Balkans	CB_10
Ich_0158	This study	Montenegro: Vilusi: Koprivice v.	42.9516	18.5911	Central Balkans	CB_10
Ich_0144	This study	Serbia: Dajićko lake	43.4243	20.2629	Central Balkans	CB_11
Ich_0145	This study	Serbia: Dajićko lake	43.4243	20.2629	Montenegro	MONT_1
Ich_0186	This study	Serbia: Vlasina	42.739	22.3302	Vlasina	VLAS_1
Ich_0191	This study	Serbia: Vlasina: Ljutež	42.7899	22.1378	Vlasina	VLAS_1
Ich_0181	This study	Serbia: Nova Varoš	43.4597	19.8154	Central Balkans	CB_11
Ich_0161	This study	Serbia: Bosilegrad: Božica v.	42.6156	22.4	Vlasina	VLAS_1
Ich_0031	This study	Ukraine: Kolochava	48.399	23.79	Eastern/Western Europe & Spain	EWES_3/4/5
ND4 long, from previous studies:
MD1	Arntzen et al. (2016)	France: Lazarc	43.85	3.35	Eastern/Western Europe & Spain	Presumed chimera and excluded
MD2	Arntzen et al. (2016)	France: Lazarc	43.85	3.35	Eastern/Western Europe & Spain	EWES_38
MD3	Arntzen et al. (2016)	France: Lazarc	43.85	3.35	Eastern/Western Europe & Spain	EWES_38
MD4	Arntzen et al. (2016)	France: Lazarc	43.85	3.35	Eastern/Western Europe & Spain	Presumed chimera and excluded
NZ1	Arntzen et al. (2016)	New Zealand: Waihi	not reported	not reported	Italy	IT_7
NZ2	Arntzen et al. (2016)	New Zealand: Waihi	not reported	not reported	Italy	IT_7
NZ3	Arntzen et al. (2016)	New Zealand: Waihi	not reported	not reported	Italy	IT_7
NZ4	Arntzen et al. (2016)	New Zealand: Waihi	not reported	not reported	Italy	IT_7
NA	Pabijan & Babik (2006)	France: Ambleteuse	50.4333	1.6	Eastern/Western Europe & Spain	EWES_1
NA	Pabijan & Babik (2006)	France: Ambleteuse	50.4333	1.6	Eastern/Western Europe & Spain	EWES_1
NA	Pabijan & Babik (2006)	France: Ambleteuse	50.4333	1.6	Eastern/Western Europe & Spain	EWES_1
NA	Pabijan & Babik (2006)	Poland: Alwernia	50.6667	19.5167	Eastern/Western Europe & Spain	EWES_4
NA	Pabijan & Babik (2006)	Poland: Dulowa	51.3333	19.5167	Eastern/Western Europe & Spain	EWES_4
NA	Pabijan & Babik (2006)	Poland: Dulowa	51.3333	19.5167	Eastern/Western Europe & Spain	EWES_4
NA	Pabijan & Babik (2006)	Poland: Holy Cross Mts	51.0167	20.8833	Eastern/Western Europe & Spain	EWES_4
NA	Pabijan & Babik (2006)	Poland: Holy Cross Mts	50.85	20.8833	Eastern/Western Europe & Spain	EWES_4
NA	Pabijan & Babik (2006)	Poland: Holy Cross Mts	50.85	20.8833	Eastern/Western Europe & Spain	EWES_4
NA	Pabijan & Babik (2006)	Poland: Holy Cross Mts	50.85	20.8833	Eastern/Western Europe & Spain	EWES_4
NA	Pabijan & Babik (2006)	Poland: Holy Cross Mts	50.85	20.8833	Eastern/Western Europe & Spain	EWES_4
NA	Pabijan & Babik (2006)	Poland: Holy Cross Mts	50.85	20.8833	Eastern/Western Europe & Spain	EWES_4
NA	Pabijan & Babik (2006)	Poland: Jurków	49.6667	20.25	Eastern/Western Europe & Spain	EWES_4
NA	Pabijan & Babik (2006)	Poland: Krempna	49.5167	21.5167	Eastern/Western Europe & Spain	EWES_4
NA	Pabijan & Babik (2006)	Poland: Lubawka	50.7333	15.85	Eastern/Western Europe & Spain	EWES_1
NA	Pabijan & Babik (2006)	Poland: Muszkowice	50.6333	16.9667	Eastern/Western Europe & Spain	EWES_1
NA	Pabijan & Babik (2006)	Poland: Piechowice	50.85	15.5833	Eastern/Western Europe & Spain	EWES_1
NA	Pabijan & Babik (2006)	Poland: Prudnik	50.3167	17.5667	Eastern/Western Europe & Spain	EWES_1
NA	Pabijan & Babik (2006)	Poland: Ślȩża	50.8833	16.7167	Eastern/Western Europe & Spain	EWES_1
NA	Pabijan & Babik (2006)	Poland: Wojborz	50.5167	16.6333	Eastern/Western Europe & Spain	EWES_1
NA	Pabijan & Babik (2006)	Poland: Złoty Stok	50.4333	16.8667	Eastern/Western Europe & Spain	EWES_1
NA	Pabijan & Babik (2006)	Romania: Baiu Mts	45.4167	25.4167	Northern Balkans & Romania	NBR_8
NA	Pabijan & Babik (2006)	Romania: Baiu Mts	45.4167	25.4167	Northern Balkans & Romania	NBR_8
NA	Pabijan & Babik (2006)	Romania: Retezat Mts	45.3333	22.7	Northern Balkans & Romania	NBR_11
NA	Pabijan & Babik (2006)	Romania: Retezat Mts	45.3333	22.7	Northern Balkans & Romania	NBR_4
NA	Pabijan & Babik (2006)	Ukraine: Charnohora	48.2	24.4667	Eastern/Western Europe & Spain	EWES_1
NA	Pabijan & Babik (2006)	Ukraine: Charnohora	48.2	24.4667	Eastern/Western Europe & Spain	EWES_1
MAB307	Recuero et al. (2014)	Austria: Arnoldstein	46.55	13.7167	Eastern/Western Europe & Spain	EWES_2
MAB308	Recuero et al. (2014)	Austria: Arnoldstein	46.55	13.7167	Eastern/Western Europe & Spain	EWES_2
MAB337	Recuero et al. (2014)	Bosnia-Herzegovina: Prokosko Jezero	43.9578	17.755	Central Balkans	CB_1
MAB338	Recuero et al. (2014)	Bosnia-Herzegovina: Prokosko Jezero	43.9578	17.755	Central Balkans	CB_2
MAB339	Recuero et al. (2014)	Bosnia-Herzegovina: Prokosko Jezero	43.9578	17.755	Central Balkans	CB_2
MAB314	Recuero et al. (2014)	Bulgaria: Smolyan	41.5667	24.7167	Central Balkans	CB_3
MAB315	Recuero et al. (2014)	Bulgaria: Smolyan	41.5667	24.7167	Central Balkans	CB_3
MAB316	Recuero et al. (2014)	Bulgaria: Smolyan	41.5667	24.7167	Central Balkans	CB_3
MAB317	Recuero et al. (2014)	Bulgaria: Smolyan	41.5667	24.7167	Central Balkans	CB_3
MAB318	Recuero et al. (2014)	Bulgaria: Smolyan	41.5667	24.7167	Central Balkans	CB_3
MAB305	Recuero et al. (2014)	France: Grazay (Mayenne)	48.2947	-0.478889	Eastern/Western Europe & Spain	EWES_1
MAB306	Recuero et al. (2014)	France: Grazay (Mayenne)	48.2947	-0.478889	Eastern/Western Europe & Spain	EWES_1
MAB363	Recuero et al. (2014)	France: Grazay (Mayenne)	48.2947	-0.478889	Eastern/Western Europe & Spain	EWES_1
MAB364	Recuero et al. (2014)	France: Grazay (Mayenne)	48.2947	-0.478889	Eastern/Western Europe & Spain	EWES_1
MAB365	Recuero et al. (2014)	France: Grazay (Mayenne)	48.2947	-0.478889	Eastern/Western Europe & Spain	EWES_1
MAB348	Recuero et al. (2014)	Germany: Kottenforst,Bonn	50.6667	7.08333	Eastern/Western Europe & Spain	EWES_1
MAB349	Recuero et al. (2014)	Germany: Kottenforst,Bonn	50.6667	7.08333	Eastern/Western Europe & Spain	EWES_1
MAB350	Recuero et al. (2014)	Germany: Kottenforst,Bonn	50.6667	7.08333	Eastern/Western Europe & Spain	EWES_1
MAB300	Recuero et al. (2014)	Greece: Karpenisi	38.9167	21.8	Southern Balkans	SB_1
MAB301	Recuero et al. (2014)	Greece: Karpenisi	38.9167	21.8	Southern Balkans	SB_1
MAB302	Recuero et al. (2014)	Greece: Karpenisi	38.9167	21.8	Southern Balkans	SB_1
MAB303	Recuero et al. (2014)	Greece: Karpenisi	38.9167	21.8	Southern Balkans	SB_1
MAB304	Recuero et al. (2014)	Greece: Karpenisi	38.9167	21.8	Southern Balkans	SB_1
MAB309	Recuero et al. (2014)	Hungary: Ajka	47.1	17.5667	Eastern/Western Europe & Spain	EWES_9
MAB310	Recuero et al. (2014)	Hungary: Ajka	47.1	17.5667	Eastern/Western Europe & Spain	EWES_9
MAB311	Recuero et al. (2014)	Hungary: Ajka	47.1	17.5667	Eastern/Western Europe & Spain	EWES_9
MAB312	Recuero et al. (2014)	Hungary: Ajka	47.1	17.5667	Eastern/Western Europe & Spain	EWES_9
MAB313	Recuero et al. (2014)	Hungary: Ajka	47.1	17.5667	Eastern/Western Europe & Spain	EWES_9
MAB433	Recuero et al. (2014)	Italy: Camporgiano (Lucca - 1989)	44.1592	10.3333	Italy	IT_7
MAB369	Recuero et al. (2014)	Italy: Cardoso (Toscana)	44.0167	10.4833	Italy	IT_5
MAB371	Recuero et al. (2014)	Italy: Cardoso (Toscana)	44.0167	10.4833	Italy	IT_5
MAB372	Recuero et al. (2014)	Italy: Cardoso (Toscana)	44.0167	10.4833	Italy	IT_5
MAB373	Recuero et al. (2014)	Italy: Cardoso (Toscana)	44.0167	10.4833	Italy	IT_5
MAB370	Recuero et al. (2014)	Italy: Cardoso (Toscana)	44.0167	10.4833	Italy	IT_7
MAB431	Recuero et al. (2014)	Italy: Lago della Bega (Lucca - 1989)	44.2167	10.2333	Italy	IT_7
MAB441	Recuero et al. (2014)	Italy: Lago di Val Noce (Genova - 1989)	44.4833	9.03333	Italy	IT_2
Ma13	Recuero et al. (2014)	Italy: Lago Trifoglietti, Montalto Uffugo, Cosenza	39.5486	16.0222	Italy	IT_4
MAB432	Recuero et al. (2014)	Italy: Monti della Laga (Rieti - 1987)	42.5356	13.5325	Italy	IT_7
MAB439	Recuero et al. (2014)	Italy: Monti della Laga (Rieti - 1989)	42.5356	13.5325	Italy	IT_7
MAB421	Recuero et al. (2014)	Italy: Mont-Megna (Ferriere:Emilia-Romagna 1200m)	44.6167	9.53333	Italy	IT_6
MAB422	Recuero et al. (2014)	Italy: Mont-Megna (Ferriere:Emilia-Romagna 1200m)	44.6167	9.53333	Italy	IT_6
MAB423	Recuero et al. (2014)	Italy: Mont-Megna (Ferriere:Emilia-Romagna 1200m)	44.6167	9.53333	Italy	IT_6
MAB424	Recuero et al. (2014)	Italy: Mont-Megna (Ferriere:Emilia-Romagna 1200m)	44.6167	9.53333	Italy	IT_6
MAB437	Recuero et al. (2014)	Italy: Negruzzo (Pavia - 1989)	44.7164	9.2175	Italy	IT_6
MAB418	Recuero et al. (2014)	Italy: Parana (Mulazzo-Tuscany 600m)	44.282	9.861	Italy	IT_6
MAB420	Recuero et al. (2014)	Italy: Parana (Mulazzo-Tuscany 600m)	44.282	9.861	Italy	IT_6
MAB430	Recuero et al. (2014)	Italy: Rossiglione (Genova - 1988)	44.5589	8.67417	Italy	IT_2
MAB426	Recuero et al. (2014)	Italy: S. Benedetto Belbo (Cueno - 1988)	44.4914	8.05889	Italy	IT_1
MAB427	Recuero et al. (2014)	Italy: S. Bovo/ Castino (Cueno - 1988)	44.6361	8.15167	Italy	IT_1
MAB429	Recuero et al. (2014)	Italy: S. Giulia (Genova - 1989)	44.3036	9.37306	Italy	IT_3
MAB351	Recuero et al. (2014)	Italy: Serravezza	44	10.2333	Italy	IT_7
MAB346	Recuero et al. (2014)	Montenegro: Bukumirsko Jezero	42.6047	19.5567	Montenegro	MONT_1
MAB340	Recuero et al. (2014)	Montenegro: Zminicko Jezero	43.1011	19.2464	Montenegro	MONT_1
MAB378	Recuero et al. (2014)	Poland: Chyszowki, near Limanowa	49.7	20.4167	Eastern/Western Europe & Spain	EWES_4
MAB379	Recuero et al. (2014)	Poland: Chyszowki, near Limanowa	49.7	20.4167	Eastern/Western Europe & Spain	EWES_4
MAB382	Recuero et al. (2014)	Poland: Chyszowki, near Limanowa	49.7	20.4167	Eastern/Western Europe & Spain	EWES_4
MAB383	Recuero et al. (2014)	Poland: Chyszowki, near Limanowa	49.7	20.4167	Eastern/Western Europe & Spain	EWES_4
MAB380	Recuero et al. (2014)	Poland: Chyszowki, near Limanowa	49.7	20.4167	Eastern/Western Europe & Spain	EWES_5
MAB374	Recuero et al. (2014)	Poland: Inwald	49.8667	19.4	Eastern/Western Europe & Spain	EWES_4
MAB375	Recuero et al. (2014)	Poland: Inwald	49.8667	19.4	Eastern/Western Europe & Spain	EWES_4
MAB376	Recuero et al. (2014)	Poland: Inwald	49.8667	19.4	Eastern/Western Europe & Spain	EWES_4
MAB377	Recuero et al. (2014)	Poland: Inwald	49.8667	19.4	Eastern/Western Europe & Spain	EWES_4
MAB409	Recuero et al. (2014)	Romania: Cumpăniţa (Argeş Dept)	45.4342	24.6061	Northern Balkans & Romania	NBR_7
MAB410	Recuero et al. (2014)	Romania: Cumpăniţa (Argeş Dept)	45.4342	24.6061	Northern Balkans & Romania	NBR_8
MAB411	Recuero et al. (2014)	Romania: Cumpăniţa (Argeş Dept)	45.4342	24.6061	Northern Balkans & Romania	NBR_8
MAB388	Recuero et al. (2014)	Romania: Sinaia (Prahova Dept.)	45.3817	25.545	Northern Balkans & Romania	NBR_8
MAB389	Recuero et al. (2014)	Romania: Sinaia (Prahova Dept.)	45.3817	25.545	Northern Balkans & Romania	NBR_8
MAB390	Recuero et al. (2014)	Romania: Sinaia (Prahova Dept.)	45.3817	25.545	Northern Balkans & Romania	NBR_8
MAB392	Recuero et al. (2014)	Romania: Sinaia (Prahova Dept.)	45.3817	25.545	Northern Balkans & Romania	NBR_8
MAB405	Recuero et al. (2014)	Romania: Tăul Secat, Retezat National Park, (Hunedoara Dept.)	45.3622	22.8297	Northern Balkans & Romania	NBR_1
MAB406	Recuero et al. (2014)	Romania: Tăul Secat, Retezat National Park, (Hunedoara Dept.)	45.3622	22.8297	Northern Balkans & Romania	NBR_4
MAB404	Recuero et al. (2014)	Romania: Tăul Secat, Retezat National Park, (Hunedoara Dept.)	45.3622	22.8297	Northern Balkans & Romania	NBR_5
MAB393	Recuero et al. (2014)	Romania: Teleajen Valley (Prahova Dept.)	45.2803	26.0433	Northern Balkans & Romania	NBR_8
MAB394	Recuero et al. (2014)	Romania: Timişu de Sus (Braşov Dept.)	45.5286	25.5756	Northern Balkans & Romania	NBR_8
MAB395	Recuero et al. (2014)	Romania: Timişu de Sus (Braşov Dept.)	45.5286	25.5756	Northern Balkans & Romania	NBR_8
MAB396	Recuero et al. (2014)	Romania: Timişu de Sus (Braşov Dept.)	45.5286	25.5756	Northern Balkans & Romania	NBR_8
MAB397	Recuero et al. (2014)	Romania: Timişu de Sus (Braşov Dept.)	45.5286	25.5756	Northern Balkans & Romania	NBR_8
MAB399	Recuero et al. (2014)	Romania: Valea Mare (Retezat National Park, Hunedoara Dept.)	45.3992	22.7703	Northern Balkans & Romania	NBR_2
MAB400	Recuero et al. (2014)	Romania: Valea Mare (Retezat National Park, Hunedoara Dept.)	45.3992	22.7703	Northern Balkans & Romania	NBR_3
MAB401	Recuero et al. (2014)	Romania: Valea Mare (Retezat National Park, Hunedoara Dept.)	45.3992	22.7703	Northern Balkans & Romania	NBR_4
MAB402	Recuero et al. (2014)	Romania: Valea Mare (Retezat National Park, Hunedoara Dept.)	45.3992	22.7703	Northern Balkans & Romania	NBR_4
MAB403	Recuero et al. (2014)	Romania: Valea Mare (Retezat National Park, Hunedoara Dept..)	45.3992	22.7703	Northern Balkans & Romania	NBR_4
MAB412	Recuero et al. (2014)	Romania: Văratec (Neamţ Dept..)	47.1403	26.2714	Eastern/Western Europe & Spain	EWES_4
MAB413	Recuero et al. (2014)	Romania: Văratec (Neamţ Dept..)	47.1403	26.2714	Eastern/Western Europe & Spain	EWES_4
MAB414	Recuero et al. (2014)	Romania: Văratec (Neamţ Dept..)	47.1403	26.2714	Eastern/Western Europe & Spain	EWES_4
MAB415	Recuero et al. (2014)	Romania: Văratec (Neamţ Dept..)	47.1403	26.2714	Eastern/Western Europe & Spain	EWES_4
MAB416	Recuero et al. (2014)	Romania: Văratec (Neamţ Dept..)	47.1403	26.2714	Eastern/Western Europe & Spain	EWES_4
MAB319	Recuero et al. (2014)	Serbia: Stanisinci near Krusevac	43.5333	20.9	Central Balkans	CB_3
MAB320	Recuero et al. (2014)	Serbia: Stanisinci near Krusevac	43.5333	20.9	Central Balkans	CB_4
MAB321	Recuero et al. (2014)	Serbia: Stanisinci near Krusevac	43.5333	20.9	Central Balkans	CB_4
MAB322	Recuero et al. (2014)	Serbia: Stanisinci near Krusevac	43.5333	20.9	Central Balkans	CB_4
MAB323	Recuero et al. (2014)	Serbia: Stanisinci near Krusevac	43.5333	20.9	Central Balkans	CB_4
Ma1	Recuero et al. (2014)	Serbia: Vlasina Lake	42.7333	22.3167	Vlasina	VLAS_1
Ma3	Recuero et al. (2014)	Serbia: Vlasina Lake	42.7333	22.3167	Vlasina	VLAS_1
Ma4	Recuero et al. (2014)	Serbia: Vlasina Lake	42.7333	22.3167	Vlasina	VLAS_1
Ma5	Recuero et al. (2014)	Serbia: Vlasina Lake	42.7333	22.3167	Vlasina	VLAS_1
Ma6	Recuero et al. (2014)	Serbia: Vlasina Lake	42.7333	22.3167	Vlasina	VLAS_1
Ma7	Recuero et al. (2014)	Serbia: Zli Do	42.4167	22.45	Central Balkans	CB_4
Ma8	Recuero et al. (2014)	Serbia: Zli Do	42.4167	22.45	Central Balkans	CB_4
Ma9	Recuero et al. (2014)	Serbia: Zli Do	42.4167	22.45	Central Balkans	CB_4
Ma10	Recuero et al. (2014)	Serbia: Zli Do	42.4167	22.45	Central Balkans	CB_4
Ma11	Recuero et al. (2014)	Serbia: Zli Do	42.4167	22.45	Central Balkans	CB_4
Ma12	Recuero et al. (2014)	Serbia: Zli Do	42.4167	22.45	Central Balkans	CB_4
MAB386	Recuero et al. (2014)	Spain: El Fito-Colunga, Asturias	43.4494	-5.2425	Eastern/Western Europe & Spain	EWES_39
MAB387	Recuero et al. (2014)	Spain: El Fito-Colunga, Asturias	43.4494	-5.2425	Eastern/Western Europe & Spain	EWES_39
MAB384	Recuero et al. (2014)	Spain: Fresnedo, Cantabria	43.3653	-3.57222	Eastern/Western Europe & Spain	EWES_40
MAB385	Recuero et al. (2014)	Spain: Fresnedo, Cantabria	43.3653	-3.57222	Eastern/Western Europe & Spain	EWES_40
MAB329	Recuero et al. (2014)	Spain: Lago del Valle	43.0433	-6.13833	Eastern/Western Europe & Spain	EWES_39
MAB330	Recuero et al. (2014)	Spain: Lago del Valle	43.0433	-6.13833	Eastern/Western Europe & Spain	EWES_39
MAB331	Recuero et al. (2014)	Spain: Lago del Valle	43.0433	-6.13833	Eastern/Western Europe & Spain	EWES_39
MAB324	Recuero et al. (2014)	Spain: Lago Ercina	43.2697	-4.98083	Eastern/Western Europe & Spain	EWES_39
MAB325	Recuero et al. (2014)	Spain: Lago Ercina	43.2697	-4.98083	Eastern/Western Europe & Spain	EWES_39
MAB326	Recuero et al. (2014)	Spain: Lago Ercina	43.2697	-4.98083	Eastern/Western Europe & Spain	EWES_39
MAB327	Recuero et al. (2014)	Spain: Lago Ercina	43.2697	-4.98083	Eastern/Western Europe & Spain	EWES_39
MAB328	Recuero et al. (2014)	Spain: Lago Ercina	43.2697	-4.98083	Eastern/Western Europe & Spain	EWES_39
MAB366	Recuero et al. (2014)	Spain: Peñalara	40.8475	-3.94861	Eastern/Western Europe & Spain	EWES_39
MAB367	Recuero et al. (2014)	Spain: Peñalara	40.8475	-3.94861	Eastern/Western Europe & Spain	EWES_39
MAB347	Recuero et al. (2014)	Spain: Peñalara	40.8475	-3.94861	Eastern/Western Europe & Spain	EWES_39
MAB341	Recuero et al. (2014)	Spain: Pola de Siero	43.3931	-5.66194	Eastern/Western Europe & Spain	EWES_39
MAB342	Recuero et al. (2014)	Spain: Pola de Siero	43.3931	-5.66194	Eastern/Western Europe & Spain	EWES_39
MAB343	Recuero et al. (2014)	Spain: Pola de Siero	43.3931	-5.66194	Eastern/Western Europe & Spain	EWES_39
MAB344	Recuero et al. (2014)	Spain: Pola de Siero	43.3931	-5.66194	Eastern/Western Europe & Spain	EWES_39
MAB345	Recuero et al. (2014)	Spain: Pola de Siero	43.3931	-5.66194	Eastern/Western Europe & Spain	EWES_39
MAB334	Recuero et al. (2014)	Spain: Santillana del Mar	43.3889	-4.10917	Eastern/Western Europe & Spain	EWES_40
MAB335	Recuero et al. (2014)	Spain: Santillana del Mar	43.3889	-4.10917	Eastern/Western Europe & Spain	EWES_40
MAB336	Recuero et al. (2014)	Spain: Santillana del Mar	43.3889	-4.10917	Eastern/Western Europe & Spain	EWES_40
MAB332	Recuero et al. (2014)	Spain: Santillana del Mar	43.3889	-4.10917	Eastern/Western Europe & Spain	EWES_41
MAB333	Recuero et al. (2014)	Spain: Santillana del Mar	43.3889	-4.10917	Eastern/Western Europe & Spain	EWES_41
IA_301	Voros et al. (2021)	Hungary: Bakonybél	47.26	17.67	Eastern/Western Europe & Spain	EWES_7
IA_201	Voros et al. (2021)	Hungary: Bakonybél	47.26	17.67	Eastern/Western Europe & Spain	EWES_9
IA_209	Voros et al. (2021)	Hungary: Bakonybél	47.26	17.67	Eastern/Western Europe & Spain	EWES_9
IA_302	Voros et al. (2021)	Hungary: Bakonybél	47.26	17.67	Eastern/Western Europe & Spain	EWES_9
IA_303	Voros et al. (2021)	Hungary: Bakonybél	47.26	17.67	Eastern/Western Europe & Spain	EWES_9
IA_213	Voros et al. (2021)	Hungary: Bükkszentkereszt	48.07	20.59	Eastern/Western Europe & Spain	EWES_4
IA_219	Voros et al. (2021)	Hungary: Hollókő	48.56	21.4	Eastern/Western Europe & Spain	EWES_4
IA_402	Voros et al. (2021)	Hungary: Isztimér	47.26	18.11	Eastern/Western Europe & Spain	EWES_8
IA_403	Voros et al. (2021)	Hungary: Isztimér	47.26	18.11	Eastern/Western Europe & Spain	EWES_8
IA_404	Voros et al. (2021)	Hungary: Isztimér	47.26	18.11	Eastern/Western Europe & Spain	EWES_8
IA_401	Voros et al. (2021)	Hungary: Isztimér	47.26	18.11	Eastern/Western Europe & Spain	EWES_9
IA_208	Voros et al. (2021)	Hungary: Kemesnye	48.13	20.5	Eastern/Western Europe & Spain	EWES_3
IA_002	Voros et al. (2021)	Hungary: Mátraszentimre	47.93	19.86	Eastern/Western Europe & Spain	EWES_4
IA_003	Voros et al. (2021)	Hungary: Parád	47.88	20.05	Eastern/Western Europe & Spain	EWES_4
IA_001	Voros et al. (2021)	Hungary: Parádsasvár	47.88	19.95	Eastern/Western Europe & Spain	EWES_4
IA_214	Voros et al. (2021)	Hungary: Répáshuta	48.04	20.55	Eastern/Western Europe & Spain	EWES_4
IA_206	Voros et al. (2021)	Hungary: Szakonyfalu	46.91	16.23	Eastern/Western Europe & Spain	EWES_6
IA_207	Voros et al. (2021)	Hungary: Szakonyfalu	46.91	16.23	Eastern/Western Europe & Spain	EWES_6
IA_215	Voros et al. (2021)	Hungary: Szakonyfalu	46.91	16.23	Eastern/Western Europe & Spain	EWES_6
IA_217	Voros et al. (2021)	Hungary: Telkibánya	47.45	21.35	Eastern/Western Europe & Spain	EWES_4
IA_218	Voros et al. (2021)	Hungary: Telkibánya	47.45	21.35	Eastern/Western Europe & Spain	EWES_4
IA_212	Voros et al. (2021)	Romania: Padis	46.59	22.71	Northern Balkans & Romania	NBR_10
IA_211	Voros et al. (2021)	Romania: Padis	46.59	22.71	Northern Balkans & Romania	NBR_6
IA_202	Voros et al. (2021)	Romania: Vartop	46.51	22.66	Northern Balkans & Romania	NBR_9
ND4 but shorter, or alternative marker, from previous studies:
MPFC1977	Jakóbik et al. (2019)	Chech republic: Karlovice	50.098	17.433	Eastern/Western Europe & Spain	n/a (ND4 but shorter)
MPFC1978	Jakóbik et al. (2019)	Chech republic: Karlovice	50.098	17.433	Eastern/Western Europe & Spain	n/a (ND4 but shorter)
MPFC1041	Jakóbik et al. (2019)	Germany: Harz mts	51.906	10.333	Eastern/Western Europe & Spain	n/a (ND4 but shorter)
MPFC1042	Jakóbik et al. (2019)	Germany: Harz mts	51.918	10.344	Eastern/Western Europe & Spain	n/a (ND4 but shorter)
MPFC1043	Jakóbik et al. (2019)	Germany: Harz mts	51.908	10.33	Eastern/Western Europe & Spain	n/a (ND4 but shorter)
MPFC705	Jakóbik et al. (2019)	Germany: Harz mts	51.938	10.288	Eastern/Western Europe & Spain	n/a (ND4 but shorter)
MPFC1037	Jakóbik et al. (2019)	Poland: Leszczawa Dolna	49.665	22.442	Eastern/Western Europe & Spain	n/a (ND4 but shorter)
MPFC1038	Jakóbik et al. (2019)	Poland: Leszczawa Dolna	49.665	22.442	Eastern/Western Europe & Spain	n/a (ND4 but shorter)
MPFC2188	Jakóbik et al. (2019)	Poland: Pasmo Brzanki	49.84	21.117	Eastern/Western Europe & Spain	n/a (ND4 but shorter)
MPFC2189	Jakóbik et al. (2019)	Poland: Pasmo Brzanki	49.84	21.117	Eastern/Western Europe & Spain	n/a (ND4 but shorter)
MPFC2190	Jakóbik et al. (2019)	Poland: Tricity Landscape Park	54.383	18.531	Eastern/Western Europe & Spain	n/a (ND4 but shorter)
MPFC3220	Jakóbik et al. (2019)	Poland: Tricity Landscape Park	54.383	18.531	Eastern/Western Europe & Spain	n/a (ND4 but shorter)
MPFC3230	Jakóbik et al. (2019)	Poland: Tricity Landscape Park	54.383	18.531	Eastern/Western Europe & Spain	n/a (ND4 but shorter)
MPFC3232	Jakóbik et al. (2019)	Poland: Tricity Landscape Park	54.395	18.516	Eastern/Western Europe & Spain	n/a (ND4 but shorter)
MPFC3233	Jakóbik et al. (2019)	Poland: Tricity Landscape Park	54.395	18.516	Eastern/Western Europe & Spain	n/a (ND4 but shorter)
MPFC2186	Jakóbik et al. (2019)	Poland: Tunel	50.437	19.999	Eastern/Western Europe & Spain	n/a (ND4 but shorter)
MPFC2187	Jakóbik et al. (2019)	Poland: Tunel	50.437	19.999	Eastern/Western Europe & Spain	n/a (ND4 but shorter)
MPFC1283	Jakóbik et al. (2019)	Poland: Zawoja	49.62	19.538	Eastern/Western Europe & Spain	n/a (ND4 but shorter)
MPFC1919	Jakóbik et al. (2019)	Romania: Borzont	46.731	25.36	Eastern/Western Europe & Spain	n/a (ND4 but shorter)
MPFC1854	Jakóbik et al. (2019)	Romania: Bradetelu	46.751	25.108	Eastern/Western Europe & Spain	n/a (ND4 but shorter)
MPFC1878	Jakóbik et al. (2019)	Romania: Lapusna	46.771	25.271	Eastern/Western Europe & Spain	n/a (ND4 but shorter)
MPFC1872	Jakóbik et al. (2019)	Romania: Larga	46.843	24.946	Eastern/Western Europe & Spain	n/a (ND4 but shorter)
37a	Sotiropoulos et al. (2007)	Austria: Brand	48.8667	15.0167	Eastern/Western Europe & Spain	n/a (16S)
37b	Sotiropoulos et al. (2007)	Austria: Brand	48.8667	15.0167	Eastern/Western Europe & Spain	n/a (16S)
36	Sotiropoulos et al. (2007)	Austria: Gaaden	47.8167	16.0667	Eastern/Western Europe & Spain	n/a (16S)
38	Sotiropoulos et al. (2007)	Austria: Irdning	47.5	14.0833	Eastern/Western Europe & Spain	n/a (16S)
41	Sotiropoulos et al. (2007)	Austria: Klein-Kordin-Alm	46.6167	12.9	Eastern/Western Europe & Spain	n/a (16S)
40	Sotiropoulos et al. (2007)	Austria: Mallnitz	46.9833	13.15	Eastern/Western Europe & Spain	n/a (16S)
42	Sotiropoulos et al. (2007)	Austria: Obertilliach	46.7	12.6	Eastern/Western Europe & Spain	n/a (16S)
39	Sotiropoulos et al. (2007)	Austria: Obertrum	47.9333	13.0667	Eastern/Western Europe & Spain	n/a (16S)
15	Sotiropoulos et al. (2007)	Bosnia & Herzegovina: Prokoško Lake (Vranica Mt.)*	43.95	17.75	Central Balkans	n/a (16S)
14	Sotiropoulos et al. (2007)	Bosnia & Herzegovina: Seljani (Rogatica)	43.8	19.0833	Central Balkans	n/a (16S)
28	Sotiropoulos et al. (2007)	Bulgaria: Satovca (W. Rodope Mts.)	41.6167	23.9667	Central Balkans	n/a (16S)
18	Sotiropoulos et al. (2007)	Croatia: Jankovac (Papuk)	45.5167	17.6833	Northern Balkans & Romania	n/a (16S)
17	Sotiropoulos et al. (2007)	Croatia: Kutarevo (Lika)	44.85	15.1667	Northern Balkans & Romania	n/a (16S)
16	Sotiropoulos et al. (2007)	Croatia: Žegar (Ušljebrka)	44.15	15.85	Northern Balkans & Romania	n/a (16S)
9	Sotiropoulos et al. (2007)	F.Y.R. Macedonia: Podgorečko Lakre (Jablanica Mt.)	41.25	20.5333	Southern Balkans	n/a (16S)
8	Sotiropoulos et al. (2007)	Greece: Drakolimni (Smolikas Mt.)*	40.0833	20.9	Southern Balkans	n/a (16S)
7	Sotiropoulos et al. (2007)	Greece: Drakolimni (Tymphi Mt.)*	39.9667	20.75	Southern Balkans	n/a (16S)
5	Sotiropoulos et al. (2007)	Greece: Elati (Kerketio Mt.)	39.5167	21.5167	Southern Balkans	n/a (16S)
29	Sotiropoulos et al. (2007)	Greece: Elatia (C. Rodope Mts.)	41.5	24.3	Central Balkans	n/a (16S)
3	Sotiropoulos et al. (2007)	Greece: Katavothra (Oeta Mt.)	38.7667	22.3167	Southern Balkans	n/a (16S)
1	Sotiropoulos et al. (2007)	Greece: Kyllini Mt.	37.9333	22.4167	Southern Balkans	n/a (16S)
2	Sotiropoulos et al. (2007)	Greece: Rakita (Panachaiko Mt.)	38.1667	21.9	Southern Balkans	n/a (16S)
4	Sotiropoulos et al. (2007)	Greece: Velouchi Mt.	38.95	21.8167	Southern Balkans	n/a (16S)
6	Sotiropoulos et al. (2007)	Greece: Zygos Mt.	39.8833	21.2833	Southern Balkans	n/a (16S)
47	Sotiropoulos et al. (2007)	Italy: Spezia	44.25	9.53333	Italy	n/a (16S)
11	Sotiropoulos et al. (2007)	Montenegro: Bukumirsko Lake (Žijovo Mt.)*	42.6	19.55	Montenegro	n/a (16S)
12	Sotiropoulos et al. (2007)	Montenegro: Kapetanovo Lake (Lukavica Mt.)*	42.8	19.2333	Montenegro	n/a (16S)
13	Sotiropoulos et al. (2007)	Montenegro: Zminičko Lake (Sinjavina Mt.)*	42.9833	19.25	Montenegro	n/a (16S)
33	Sotiropoulos et al. (2007)	Romania: Prahova Valley	45.4667	25.5667	Northern Balkans & Romania	n/a (16S)
34	Sotiropoulos et al. (2007)	Romania: Sihastria Monastery	46.9333	26.1833	Eastern/Western Europe & Spain	n/a (16S)
30	Sotiropoulos et al. (2007)	Romania: Taul Secat, Retezat N.P.	45.3167	22.7	Northern Balkans & Romania	n/a (16S)
35	Sotiropoulos et al. (2007)	Romania: Varatec	47.6333	26.3667	Eastern/Western Europe & Spain	n/a (16S)
32	Sotiropoulos et al. (2007)	Romania: Vidrard Lake, Fagaras Mts.	45.35	24.6333	Northern Balkans & Romania	n/a (16S)
31	Sotiropoulos et al. (2007)	Romania: Zanoaga Lake, Retezat N.P.	45.3333	22.7167	Northern Balkans & Romania	n/a (16S)
26a	Sotiropoulos et al. (2007)	Serbia: Bosica	42.6167	22.3833	Vlasina	n/a (16S)
26b	Sotiropoulos et al. (2007)	Serbia: Bosica	42.6167	22.3833	Vlasina	n/a (16S)
26c	Sotiropoulos et al. (2007)	Serbia: Bosica	42.6167	22.3833	Vlasina	n/a (16S)
10	Sotiropoulos et al. (2007)	Serbia: Donje ravne mlake (Šara Mt.)	41.9	20.6833	Southern Balkans	n/a (16S)
21	Sotiropoulos et al. (2007)	Serbia: Jezero (Sveti Ilija Mt.)	42.6	21.85	Central Balkans	n/a (16S)
19	Sotiropoulos et al. (2007)	Serbia: Joševa	44.3667	19.8333	Central Balkans	n/a (16S)
25a	Sotiropoulos et al. (2007)	Serbia: Klisura	42.75	22.4167	Vlasina	n/a (16S)
25b	Sotiropoulos et al. (2007)	Serbia: Klisura	42.75	22.4167	Vlasina	n/a (16S)
25c	Sotiropoulos et al. (2007)	Serbia: Klisura	42.75	22.4167	Vlasina	n/a (16S)
20	Sotiropoulos et al. (2007)	Serbia: Ljubina bara (Južni Kučaj Mt.)	43.9333	21.6667	Central Balkans	n/a (16S)
23a	Sotiropoulos et al. (2007)	Serbia: Mlačiške Meane	42.7667	22.2333	Vlasina	n/a (16S)
23b	Sotiropoulos et al. (2007)	Serbia: Mlačiške Meane	42.7667	22.2333	Vlasina	n/a (16S)
22	Sotiropoulos et al. (2007)	Serbia: Vlasina	42.7333	22.3167	Vlasina	n/a (16S)
24	Sotiropoulos et al. (2007)	Serbia: Vlasina Stojkovića	42.7	22.3833	Vlasina	n/a (16S)
27	Sotiropoulos et al. (2007)	Serbia: Zli Do (Bosilegrad)	42.4167	22.45	Central Balkans	n/a (16S)
51	Sotiropoulos et al. (2007)	Spain: Zubilabala-Erreka	43.0333	-2.68333	Eastern/Western Europe & Spain	n/a (16S)
48	Sotiropoulos et al. (2007)	The Netherlands: Eindhoven	51.4167	5.46667	Eastern/Western Europe & Spain	n/a (16S)
49a	Sotiropoulos et al. (2007)	The Netherlands: Leende	51.3167	5.53333	Eastern/Western Europe & Spain	n/a (16S)
49b	Sotiropoulos et al. (2007)	The Netherlands: Leende	51.3167	5.53333	Eastern/Western Europe & Spain	n/a (16S)
3a	Šunje et al. (2021)	Bosnia and Herzegovina: Mt. Prenj/Rujište	43.45	17.976	Central Balkans	n/a (16S, CytB)
3b	Šunje et al. (2021)	Bosnia and Herzegovina: Mt. Prenj/Rujište	43.45	17.976	Central Balkans	n/a (16S, CytB)
3c	Šunje et al. (2021)	Bosnia and Herzegovina: Mt. Prenj/Rujište	43.45	17.976	Central Balkans	n/a (16S, CytB)
5a	Šunje et al. (2021)	Bosnia and Herzegovina: Bihać	44.805	15.864	Central Balkans	n/a (16S, CytB)
5b	Šunje et al. (2021)	Bosnia and Herzegovina: Bihać	44.805	15.864	Northern Balkans & Romania	n/a (16S, CytB)

## Sheet: Table S2
Table S2. GenBank accession numbers for haplotypes of the mtDNA gene ND4 for the alpine newt (Ichthyosaura alpestris).
CB_1	OR058986
CB_2	OR058987
CB_3	OR058988
CB_4	OR058989
CB_5	OR058990
CB_6	OR058991
CB_7	OR058992
CB_8	OR058993
CB_9	OR058994
CB_10	OR058995
CB_11	OR058996
CB_12	OR058997
CB_13	OR058998
CB_14	OR058999
CB_15	OR059000
CB_16	OR059001
CB_17	OR059002
CB_18	OR059003
CB_19	OR059004
EWES_1	OR059005
EWES_2	OR059006
EWES_3	OR059007
EWES_4	OR059008
EWES_5	OR059009
EWES_6	OR059010
EWES_7	OR059011
EWES_8	OR059012
EWES_9	OR059013
EWES_10	OR059014
EWES_11	OR059015
EWES_12	OR059016
EWES_13	OR059017
EWES_14	OR059018
EWES_15	OR059019
EWES_16	OR059020
EWES_17	OR059021
EWES_18	OR059022
EWES_19	OR059023
EWES_20	OR059024
EWES_21	OR059025
EWES_22	OR059026
EWES_23	OR059027
EWES_24	OR059028
EWES_25	OR059029
EWES_26	OR059030
EWES_27	OR059031
EWES_28	OR059032
EWES_29	OR059033
EWES_30	OR059034
EWES_31	OR059035
EWES_32	OR059036
EWES_33	OR059037
EWES_34	OR059038
EWES_35	OR059039
EWES_36	OR059040
EWES_37	OR059041
EWES_38	OR059042
EWES_39	OR059043
EWES_40	OR059044
EWES_41	OR059045
EWES_42	OR059046
IT_1	OR059047
IT_2	OR059048
IT_3	OR059049
IT_4	OR059050
IT_5	OR059051
IT_6	OR059052
IT_7	OR059053
MONT_1	OR059054
MONT_2	OR059055
MONT_3	OR059056
MONT_4	OR059057
MONT_5	OR059058
MONT_6	OR059059
NBR_1	OR059060
NBR_2	OR059061
NBR_3	OR059062
NBR_4	OR059063
NBR_5	OR059064
NBR_6	OR059065
NBR_7	OR059066
NBR_8	OR059067
NBR_9	OR059068
NBR_10	OR059069
NBR_11	OR059070
NBR_12	OR059071
NBR_13	OR059072
NBR_14	OR059073
NBR_15	OR059074
NBR_16	OR059075
NBR_17	OR059076
NBR_18	OR059077
SB_1	OR059078
SB_2	OR059079
SB_3	OR059080
SB_4	OR059081
SB_5	OR059082
SB_6	OR059083
SB_7	OR059084
VLAS_1	OR059085

## Sheet: Table S3
Table S3. Distribution of haplotypes of the mtDNA gene ND4 in natural populations of the alpine newt (Ichthyosaura alpestris) and nucleotide diversity at country-level.
Haplotype	Albania	Austria	Belgium	Bosnia and Herzegovina	Bulgaria	Croatia	France	Germany	Greece	Hungary	Italy	Montenegro	Netherlands	Poland	Romania	Serbia	Slovakia	Slovenia	Spain	Switzerland	Ukraine
CB_1				x
CB_2				x
CB_3					x											x
CB_4					x											x
CB_5																x
CB_6				x
CB_7				x
CB_8				x
CB_9				x
CB_10				x								x
CB_11																x
CB_12																x
CB_13						x
CB_14				x
CB_15																x
CB_16																x
CB_17					x
CB_18				x
CB_19				x
EWES_1			x				x	x			x		x	x						x	x
EWES_2		x
EWES_3										x
EWES_4										x				x	x		x				x
EWES_5														x
EWES_6										x
EWES_7										x
EWES_8										x
EWES_9										x
EWES_10													x
EWES_11								x
EWES_12																				x
EWES_13								x
EWES_14													x
EWES_15																		x
EWES_16								x
EWES_17											x
EWES_18																		x
EWES_19											x
EWES_20													x
EWES_22													x
EWES_23													x
EWES_24											x
EWES_25																		x
EWES_26											x							x
EWES_27																		x
EWES_28													x
EWES_29														x
EWES_30																		x
EWES_31																		x
EWES_32																		x
EWES_33																		x
EWES_34																		x
EWES_35																		x
EWES_36																		x
EWES_37																		x
EWES_39																			x
EWES_40																			x
EWES_41																			x
EWES_42																			x
IT_1											x
IT_2											x
IT_3											x
IT_4											x
IT_5											x
IT_6											x
IT_7											x
MONT_1												x
MONT_2																x
MONT_3												x
MONT_4	x
MONT_5	x
MONT_6												x
NBR_1															x
NBR_2															x
NBR_3															x
NBR_4															x
NBR_5															x
NBR_6															x
NBR_7															x
NBR_8															x
NBR_9															x
NBR_10															x
NBR_11															x
NBR_12						x
NBR_13															x
NBR_14						x
NBR_15						x
NBR_16						x
NBR_17						x
NBR_18																		x
SB_1									x
SB_2									x
SB_3									x
SB_4									x
SB_5									x
SB_6									x
SB_7	x
VLAS_1					x											x
Clade (number of haplotypes)	Albania	Austria	Belgium	Bosnia and Herzegovina	Bulgaria	Croatia	France	Germany	Greece	Hungary	Italy	Montenegro	Netherlands	Poland	Romania	Serbia	Slovakia	Slovenia	Spain	Switzerland	Ukraine
CB				10	3	1						1				7
EWES		1	1				1	4		6	5		7	4	1		1	13	4	2	2
IT											7
MONT	2											3				1
NBR						5									12			1
SB	1								6
VLAS					1											1
Nucleotide diversity (pi)	Albania	Austria	Belgium	Bosnia and Herzegovina	Bulgaria	Croatia	France	Germany	Greece	Hungary	Italy	Montenegro	Netherlands	Poland	Romania	Serbia	Slovakia	Slovenia	Spain	Switzerland	Ukraine
CB				0.00886	0.00071	0						0				0.00486
EWES		0	0				0	0.00081		0.00697	0.00505		0.00073	0.00141	0		0	0.00739	0.00202	0.00092	0.00205
IT											0.01125
MONT	0.00154											0.00486				0
NBR						0									0.00265			0
SB	0								0.01669
VLAS					0											0

## Sheet: Table S4
Table S4. Differences in PCR succes and DNA yield between buccal and skin swabs.
	PCR succes		DNA yield (ng/ul)
	buccal	skin	buccal	skin
swab_0441	1	1	212.54	0
swab_0442	1	1	40.78	9.74
swab_0443	1	1	106.83	0
swab_0456	1	1	35.31	4.29
swab_0457	1	1	94.55	1.11
swab_0469	1	1	122.71	5.85
swab_0470	1	1	158.97	13.52
swab_0471	1	1	95.54	1.15
swab_0481	1	1	391.4	19.23
swab_0482	1	0	164.02	0
swab_0483	1	1	70.72	51.98
swab_0489	1	1	77.93	9
swab_0494	1	1	60.22	3.25
swab_0495	1	1	53.1	23.33
swab_0496	1	1	7.21	25.74
swab_0501	1	1	84.45	7.84
swab_0502	1	1	267.01	0
swab_0532	0	1	1.6	0
total	17	17
expected	18	18
p value	0.738883
average			113.605	9.77944

## Sheet: Table S5
Table S5. List of contributing citizen scientists.
Bernadet Adriaenssens
Lieuwe Anema
Anton van Beek
Simon van den Berg
Wilco van den Berg
Jesper Berndsen
Ina Blanke
Andrea Bloem
Ronald de Boer
Ingrid den Boer
Esther Böhmer
David Broek
Daphne van den Broek
David Brouwer
Nick Cramer
Ruud Cuijk
Inge van Dam
Annemarie van Diepenbeek
Guus van Duin
Nico Ettema
Maarten Gilbert
Jelmer Groen
Lex Groenewold
Ado Havermans
Annemiek van der Heide
Evert van der Heide
Mark Hessels
Jan van Hijum
Odile Hilgenkamp
Gijs van Hoorn
Arnout Imhof
Jöran Janse
Jannie de Jong
Kris Joosten
Jaap van Kemenade
Anke van Kempen
Marcel Klootwijk
Gerrit Kolenbrander
Ellen Koppendraaier
Anna Kreffer
Willem van Kuijk
Naomi Lambrikx
Petra van Leeuwen
Marco Leloux
Ton Lenders
Johannes van der Linden
Rene Maas
Petra Maas-de Vos
Zyas van der Maat
Matty Meij
Aletta Meijer
Hans Moonen
Marjolein Munsterman
Eddy Oorthuysen
Peter Otte
Mandy Paulisse
Geert van Poelgeest
Jeroen Rheinhold
Arnold van Rijsewijk
Erik Sanders
Johan Scheeres
Joop Scheijbeler
Adri Schols
Boudewijn Sirks
Mirthe Sluiter
Ronald Sluiter
Thijs Sluiter
Jos Stadhouder
Herman Stevens
Jan Stronks
Geert Timmermans
Rolf Veenhuizen
Frans Vermeer
Brecht de Vries
Hugo van der Wal
Ben van Wierst
Wim de Wild

## Sheet: Table S6
Table S6. Permits to conduct fieldwork.
Country	Agency	Number	Notes
Bosnia and Hezegovina	Federal ministry of environment and tourism	04/2-19-2-126/21 ZM
Bosnia and Hezegovina	Federal ministry of environment and tourism	04/2-19-2-173/22
Bosnia and Hezegovina	Ministry of Education and Culture of the Republika Srpska	07/1.30/625-094/21
Croatia	Ministry of Economy and Sustainable Development	KLASA UP/I-612-07/17-48/77
Croatia	Ministry of Economy and Sustainable Development	UP/I-612-07/20-48/38
Croatia	Ministry of Economy and Sustainable Development	UP/I-352-04/22-08/75
Croatia	Ministry of Economy and Sustainable Development	URBROJ 517-07-1-1-1-17-4
Croatia	Ministry of Economy and Sustainable Development	URBROJ 517-05-1-1-20-4
Croatia	Ministry of Economy and Sustainable Development	URBROJ 517-10-1-1-22-3
Greece	Greek Ministry of the Environment	ΩΓ5Β465ΦΘΗ-ΘΣΜ	Sampling took place according to Hellenic National Law (Presidential Decree 67/81)
Greece	Greek Ministry of the Environment	ΩΚΖΤ4653Π8-422	Sampling took place according to Hellenic National Law (Presidential Decree 67/81)
Italy	Italian Ministry of Environment	DPN-2009-0026530
Poland	General Directorate for Environmental Protection in Poland	DZP-WG.6401.02.2.2018.kp.2
Romania	Comisia Monumentelor Naturii, Romanian Academy	4105/15.05.2008
Romania	Comisia Monumentelor Naturii, Romanian Academy	4249/07.01.2020
Slovakia	Ministry of Environment of the Slovak Republic	4996/2017-6.3
Slovenia	Ministrstvo za okolje in prostor - Agencija Republike Slovenije za okolje	35601-28/2017-5
Slovenia	Slovenian Environmental Agency	35601-40/2017-4
Slovenia	Triglav National Park	35611-22/2021 -2
Spain	Principado de Asturias	DECO/2021/2301
Spain	Gobierno de Navarra	0001-0261-2021-000014
The Netherlands	Ministry of Economic Affairs and Climate Policy	FF/75A/2016/015	via Reptile, Amphibian and Fish Conservation Netherlands (RAVON)
Wales	Home Office	P8897246A
Wales	Natural Resources Wales	S087548/1
